# Supplementary material for: Revisiting the intense NIR active bronzaphyrin, a 26-π aromatic expanded porphyrin: synthesis and structural analysis
Source: Royal Society of Chemistry journal article supplement (doi:10.1039/c8cc07752e), 2018-01-01
Supplement: c8cc07752e1.pdf [file c8cc07752e1.pdf]

## Electronic Supporting Information

### Revisiting the intense NIR active bronzaphyrin, a 26- $\pi$ aromatic expanded porphyrin: Synthesis and structural analysis

*M. V. Nanda Kishore and Pradeepta K. Panda\**

#### Contents

|    |                                                                                  |         |
|----|----------------------------------------------------------------------------------|---------|
| 1. | Instrumentation and reagents                                                     | S2      |
| 2. | Experimental details                                                             | S3-S4   |
| 3. | $^1\text{H}$ and $^{13}\text{C}$ NMR, HRMS spectra                               | S5-S12  |
| 4. | Computational studies                                                            | S13-S22 |
| 5. | Crystallographic parameters for <b>8</b> and <b>8.H<sub>2</sub><sup>2+</sup></b> | S23-S24 |
| 6. | ORTEP Diagrams                                                                   | S25-S27 |
| 7. | Absorption and Emission studies                                                  | S28     |
| 8. | Electrochemical studies                                                          | S29     |
| 9. | References                                                                       | S29-S30 |

## 1. Instrumentation and reagents:

NMR spectra were recorded on a Bruker Avance-400 and 500 MHz FT NMR spectrometers using tetramethylsilane (TMS,  $\delta = 0$ ) as an internal standard at room temperature. Mass spectral determinations were carried out by Shimadzu-LCMS-2010 and Bruker Maxis Spectrometer by ESI techniques. UV-visible spectra were recorded on Perkin Elmer Lambda-35 spectrometer. Spectroscopic grade solvents were used for all absorbance measurement. Melting points were determined on MR-Vis+ visual melting point range apparatus from LABINDIA instruments private limited. IR spectra were recorded on a JASCO-FT-IR model 5300 and NICOLET 5700 FT-IR spectrometer.

Cyclic voltammetric (CV) and differential pulse voltammetric (DPV) measurements were done using Zahner Zennium Electrochemical Workstation and electrodes were purchased from CH Instruments Inc. All measurements were done in dichloromethane under flow of nitrogen and 0.1M tetrabutylammonium hexafluorophosphate (TBAPF<sub>6</sub>) used as a supporting electrolyte. Platinum disc as working electrode, platinum wire as counter electrode and Ag/AgCl in (1M) KCl as reference electrode were used. Ferrocenium/Ferrocene, Fc<sup>+</sup>/Fc couple was used as external reference for calibration. The redox potentials were referenced vs. sat. calomel electrode, SCE (0.48V vs SCE for Fc<sup>+</sup>/Fc couple). All cyclic voltammetric data were recorded at 100 mV/s scan rate.

Crystallographic data for **8** was collected on Oxford Gemini A Ultra diffractometer with dual source. Cu-K $\alpha$  ( $\lambda = 1.54184 \text{ \AA}$ ) radiation was used to collect the X-ray reflections of the crystals. Data reduction was performed using CrysAlisPro 171.33.55 software.<sup>S1</sup> Structures were solved by using Olex2-1.0 with anisotropic displacement parameters for non-H atoms and final refinement was done by SHELXL-2014/7.<sup>S2</sup> Crystallographic data for **8**.(TFA)<sub>2</sub> were collected on BRUKER SMART-APEX CCD diffractometer. Mo  $\alpha$  ( $\lambda = 0.71073 \text{ \AA}$ ) radiation was used to collect X-ray reflections on the single crystal. Data reduction was performed using Bruker SAINT software.<sup>S3</sup> Intensities for absorption were corrected using SADABS<sup>S4</sup> and refined using SHELXL-2014/7 with anisotropic displacement parameters for non-H atoms. Hydrogen atoms on O and N were experimentally located in difference electron density maps. A check of the final CIF file using PLATON<sup>S5</sup> did not show any missed symmetry.

Crystallographic data (including the structure factor) for structures **8** and **8**.(TFA)<sub>2</sub> in this paper have been deposited in the Cambridge Crystallographic Data Centre as supplementary publication numbers CCDC 1500785 and CCDC 1869467. Copies of the data can be obtained free of charge on application to CCDC, 12 Union Road, Cambridge CB2 1EZ, UK (Fax: +44(0)-1223-336033 or e-mail: [deposit@ccdc.cam.ac.uk](mailto:deposit@ccdc.cam.ac.uk)).

Commercially available solvents were distilled before use. Reagents were purchased from Sigma Aldrich and used as received without further purification unless otherwise stated. Solvents for the reactions were dried according to literature methods.

## 2. Experimental details:

Synthetic details of compounds are described below.

### Synthesis of thiophene substituted terpyrrole diacid **6**:

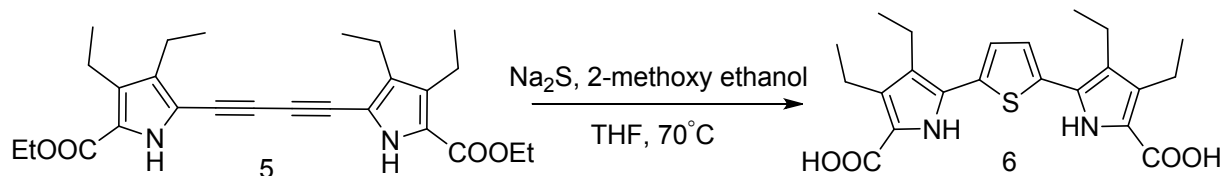

Butadiyne bridged bipyrrole **5** (436 mg, 1 mmol) and  $\text{Na}_2\text{S}$  (1.2 g, 5 mmol) were dissolved in THF/2-methoxyethanol and heated at  $70^\circ\text{C}$  for 4 h. The solution thus obtained, poured in excess water and treated with HCl solution, yielding the desired product as precipitate (370 mg, 90%).

Melting point:  $195\text{-}197^\circ\text{C}$ ; FTIR data:  $3442, 2962, 1655, 1458\text{ cm}^{-1}$ ;  $^1\text{H NMR}$  (500 MHz,  $\text{MeOH-}d_4$ ):  $\delta$  in ppm 7.27 (s, 2H,  $\beta$ -CH thiophene), 2.80 (q, 4H,  $J = 7.5\text{ Hz}$ ,  $\text{CH}_2$  alkyl), 2.69 (q, 4H,  $J = 7.5\text{ Hz}$ ,  $\text{CH}_2$  alkyl), 1.18 (m, 12H,  $\text{CH}_3$  alkyl);  $^{13}\text{C NMR}$  not recorded due to lack of solubility; HRMS  $m/z$  calcd. for  $(\text{M}+\text{H})^+$   $\text{C}_{22}\text{H}_{27}\text{N}_2\text{O}_4\text{S}$ :415.1692, found 415.1689.

### Synthesis of thiophene substituted terpyrrole dialdehyde **7**:

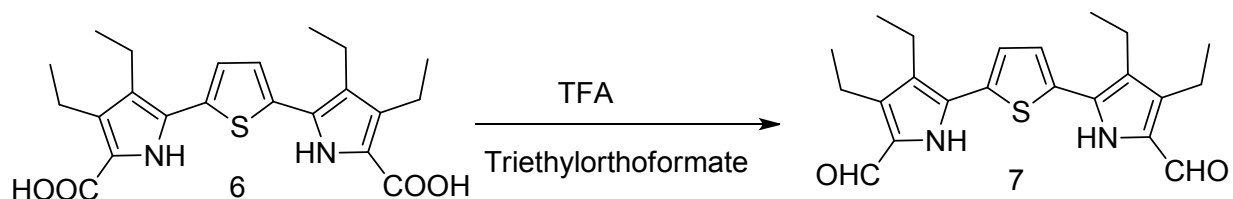

The diacid derivative **6** (100 mg, 0.24 mmol) was dissolved in TFA (1 mL) under nitrogen atmosphere while maintaining the reaction flask at  $0^\circ\text{C}$  and stirred for further 15 min. Then triethyl orthoformate (500  $\mu\text{L}$ , 3 mmol) was added and stirred for 3h at rt. The reaction mixture was quenched using 1N NaOH solution and extracted with dichloromethane. After complete evaporation of the solvent, the crude product was purified by column chromatography in 20% EtOAc + 80% Hexane to obtain the dialdehyde **7** in 38% yield.

Melting point:  $248\text{-}250^\circ\text{C}$ ; FTIR data:  $3292, 2957, 1644, 1412\text{ cm}^{-1}$ ;  $^1\text{H NMR}$  (400 MHz,  $\text{CDCl}_3$ ):  $\delta$  in ppm 9.63 (s, 2H,  $-\text{CHO}$ ), 9.34 (s, 2H, NH), 7.28 (s, 2H,  $\beta$ -CH thiophene), 2.74 (m, 8H,  $\text{CH}_2$  alkyl), 1.29 (t, 6H,  $J=7.6\text{ Hz}$ ,  $\text{CH}_3$  alkyl), 1.22 (t, 6H,  $J=7.6\text{ Hz}$ ,  $\text{CH}_3$  alkyl);  $^{13}\text{C NMR}$  (100 MHz,  $\text{CDCl}_3$ ):  $\delta$  in ppm 176.94, 138.85, 133.45, 130.07, 128.55, 125.60, 125.54, 17.70, 17.59, 17.00, 15.50; HRMS  $m/z$  calcd. for  $(\text{M}+\text{H})^+$   $\text{C}_{22}\text{H}_{27}\text{N}_2\text{O}_2\text{S}$ :383.1793, found 383.1793.

### Synthesis of dithiabronzaphyrin **8**:

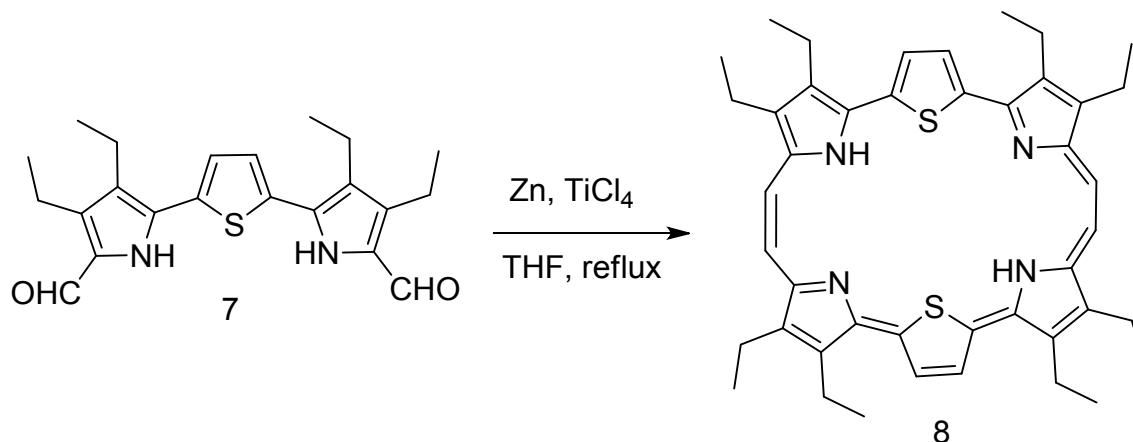

To a three-neck round bottom flask fitted with a dropping funnel and a reflux condenser, activated zinc dust (654 mg, 10 mmol) was added followed by THF (50 mL). Keeping the flask in an ice bath, TiCl<sub>4</sub> (550  $\mu$ L, 5 mmol) was added and subsequently, the reaction mixture was refluxed for 4h. Then thiophene substituted terpyrrole dialdehyde **7** (96 mg, 0.25 mmol) along with pyridine (1 mL) in THF (50 mL) was added slowly and the reflux continued for another 18 h. The reaction mixture was quenched using 10% K<sub>2</sub>CO<sub>3</sub> solution, filtered and the aqueous layer was extracted with chloroform/ethyl acetate. After complete evaporation of solvent, the solid thus obtained was dissolved again in chloroform/dichloromethane, stirred for 1h to open air and was purified by column chromatography using 50% hexane in dichloromethane to obtain the desired pure macrocycle **8** (20 mg, 24%).

Melting point: >300°C; FTIR data: 2957, 2926, 1459, 1423 cm<sup>-1</sup>; UV-Vis (CHCl<sub>3</sub>):  $\lambda$  in nm ( $\epsilon$ ) 467 (4.48), 548 (4.07), 867 (4.35), 904 (4.38); (CHCl<sub>3</sub>/TFA):  $\lambda$  in nm ( $\epsilon$ ) 501 (4.73), 574 (4.26), 888 (4.62); Fluorescence (CHCl<sub>3</sub>,  $\lambda_{\text{ex}}$  = 450nm with slit widths of 14nm)  $\lambda_{\text{max}}$ : 959 nm; <sup>1</sup>H NMR (400 MHz, CDCl<sub>3</sub>):  $\delta$  in ppm 8.85 (s, 4H, meso CH), 6.50 (s, 2H, NH), 3.92 (q, 8H,  $J=7.6$  Hz, CH<sub>2</sub> alkyl), 3.67 (q, 8H,  $J=7.6$  Hz, CH<sub>2</sub> alkyl), 1.87 (t, 12H,  $J=7.6$  Hz, CH<sub>3</sub> alkyl), 1.72 (t, 12H,  $J=7.6$  Hz, CH<sub>3</sub> alkyl); <sup>13</sup>C NMR not recorded due to lack of solubility; HRMS  $m/z$  calcd. for (M+H)<sup>+</sup> C<sub>44</sub>H<sub>51</sub>N<sub>4</sub>S<sub>2</sub>:699.3555, found 699.3555.

### 3. $^1\text{H}$ NMR, $^{13}\text{C}$ NMR and HRMS spectra of compounds:

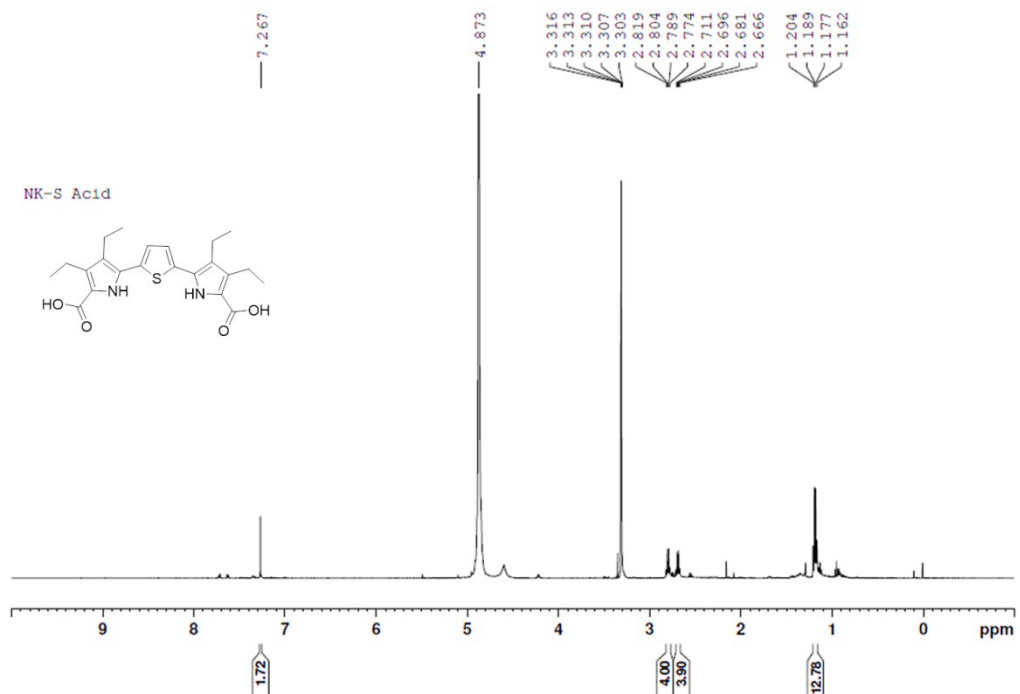

Figure S1:  $^1\text{H}$  NMR spectrum of **6** in Methanol- $d_4$ .

# BRUKER MAXIS HRMS REPORT

School of Chemistry  
University of Hyderabad

|                      |                                           |                  |                      |  |
|----------------------|-------------------------------------------|------------------|----------------------|--|
| <b>Analysis Info</b> |                                           | Acquisition Date | 4/10/2014 4:50:28 PM |  |
| Analysis Name        | D:\Data\2014\Dr.P.K.PANDA\APRLINK-152-1.d | Operator         | Ramu Sridhar         |  |
| Method               | tune_low_Pos.m                            | Instrument       | maXis 10138          |  |
| Sample Name          | NK-152-1-CHCL3-ACN                        | Comment          |                      |  |

|                              |            |                       |           |                  |           |
|------------------------------|------------|-----------------------|-----------|------------------|-----------|
| <b>Acquisition Parameter</b> |            |                       |           |                  |           |
| Source Type                  | ESI        | Ion Polarity          | Positive  | Set Nebulizer    | 4.4 psi   |
| Focus                        | Not active | Set Capillary         | 2800 V    | Set Dry Heater   | 180 °C    |
| Scan Begin                   | 50 m/z     | Set End Plate Offset  | -500 V    | Set Dry Gas      | 4.0 l/min |
| Scan End                     | 1500 m/z   | Set Collision Cell RF | 350.0 Vpp | Set Divert Valve | Waste     |

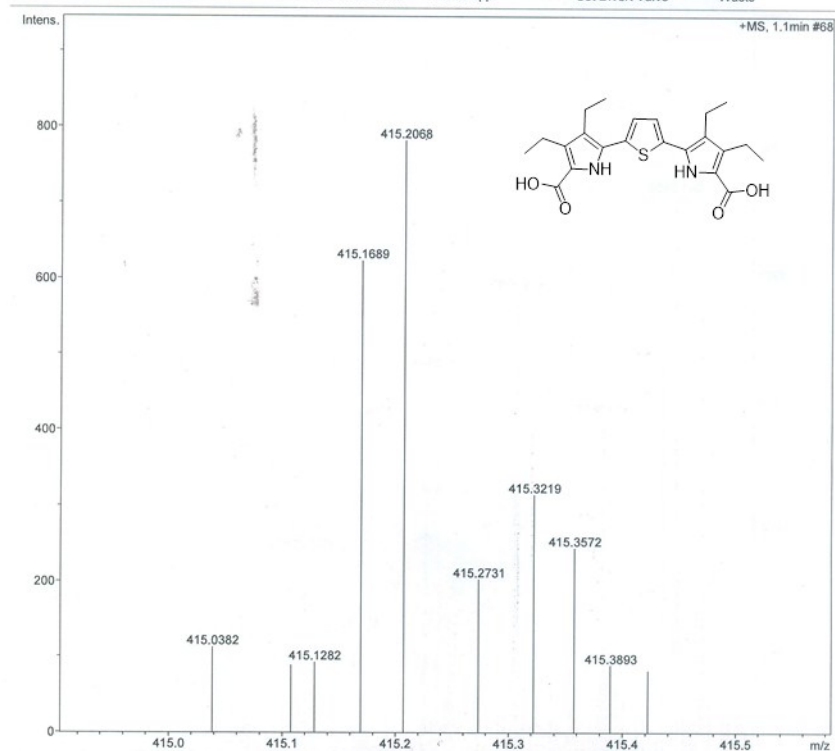

Bruker Compass DataAnalysis 4.0

printed: 4/10/2014 4:52:39 PM

Page 1 of 1

**Figure S2:** HRMS spectrum of **6** (M+H)<sup>+</sup>: Calculated for C<sub>22</sub>H<sub>27</sub>N<sub>2</sub>O<sub>4</sub>S: 415.1692; found: 415.1689.

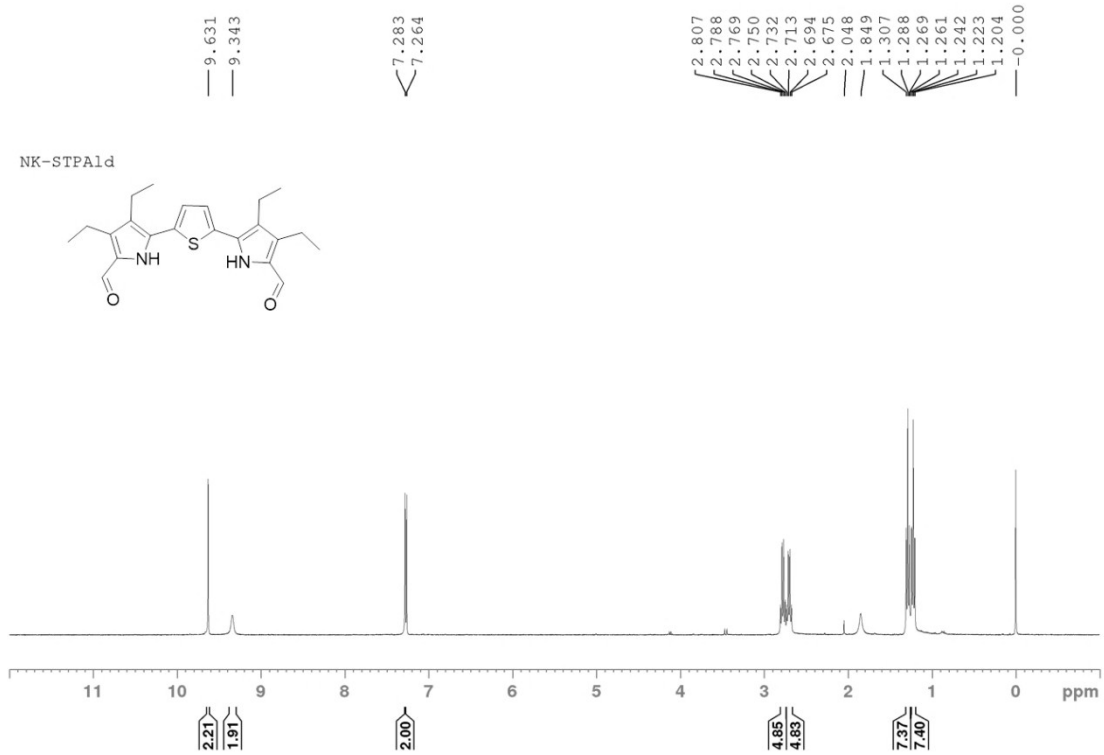

**Figure S3:** <sup>1</sup>H NMR spectrum of **7** in CDCl<sub>3</sub>.

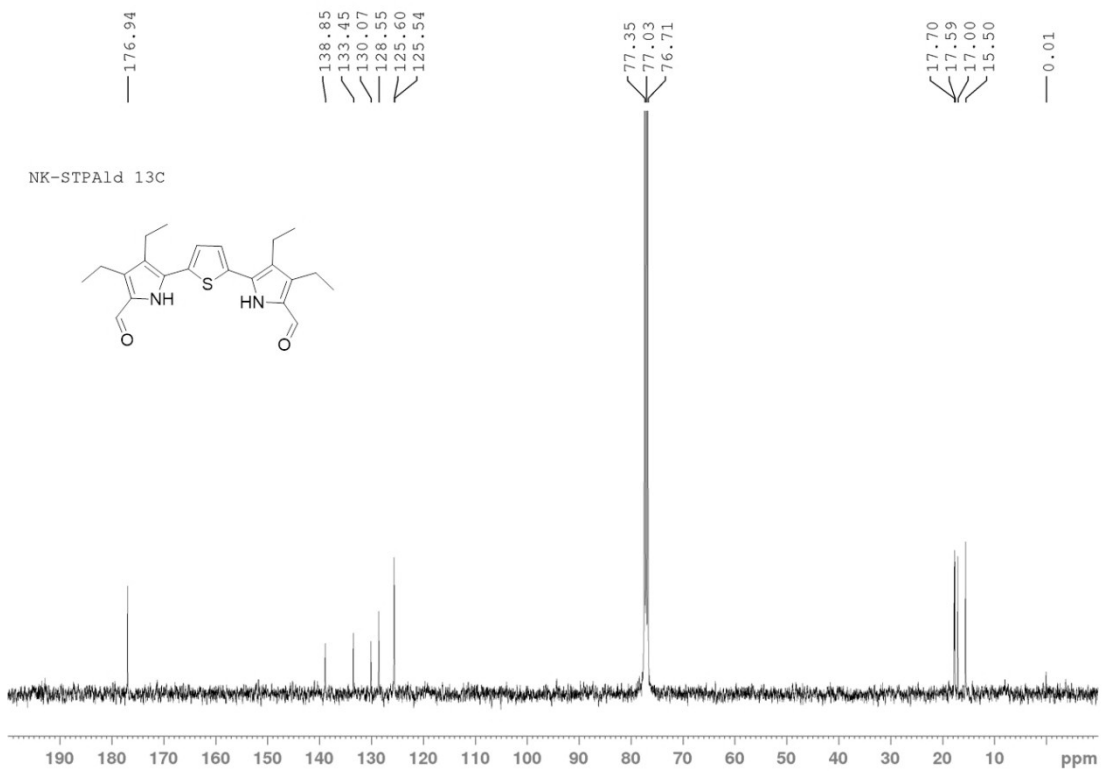

**Figure S4.** <sup>13</sup>C NMR spectrum of **7** in CDCl<sub>3</sub>.

UOH -SCHOOL OF CHEMISTRY -HRMS

|                      |                                          |                  |                      |
|----------------------|------------------------------------------|------------------|----------------------|
| <b>Analysis Info</b> |                                          | Acquisition Date | 6/22/2016 3:37:54 PM |
| Analysis Name        | D:\Data\2016\Dr.P.K.PANDAUJUNEWK--SALD.d | Operator         | Rajesh Vashisth      |
| Method               | tune_low_Pos-R2.m                        | Instrument       | maXis 10138          |
| Sample Name          | NK-SALD                                  |                  |                      |
| Comment              |                                          |                  |                      |

|                              |            |                       |           |
|------------------------------|------------|-----------------------|-----------|
| <b>Acquisition Parameter</b> |            |                       |           |
| Source Type                  | ESI        | Ion Polarity          | Positive  |
| Focus                        | Not active | Set Capillary         | 3800 V    |
| Scan Begin                   | 50 m/z     | Set End Plate Offset  | -500 V    |
| Scan End                     | 2580 m/z   | Set Collision Cell RF | 350.0 Vpp |
|                              |            | Set Nebulizer         | 0.3 Bar   |
|                              |            | Set Dry Heater        | 180 °C    |
|                              |            | Set Dry Gas           | 4.0 l/min |
|                              |            | Set Divert Valve      | Waste     |

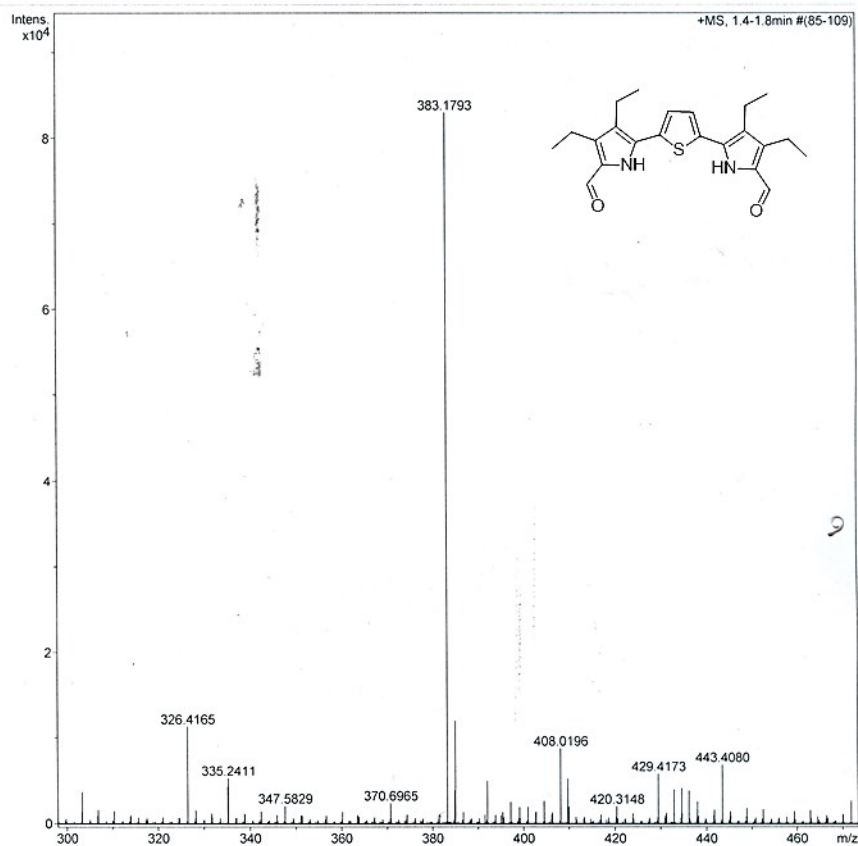

Bruker Compass DataAnalysis 4.0

printed: 6/22/2016 3:41:57 PM

Page 1 of 1

**Figure S5:** HRMS spectrum of **7** (M+H)<sup>+</sup>; Calculated for C<sub>22</sub>H<sub>27</sub>N<sub>2</sub>O<sub>2</sub>S: 383.1793; found: 383.1793.



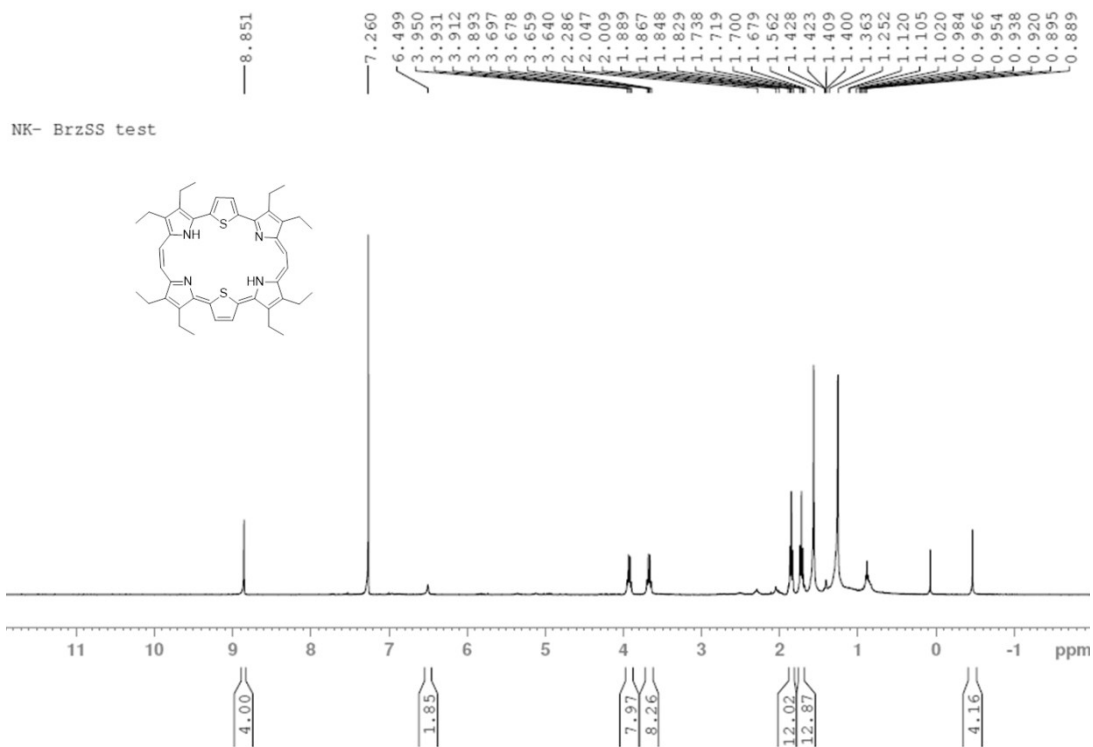

**Figure S6:**  $^1\text{H}$  NMR spectrum of **8** in  $\text{CDCl}_3$ .

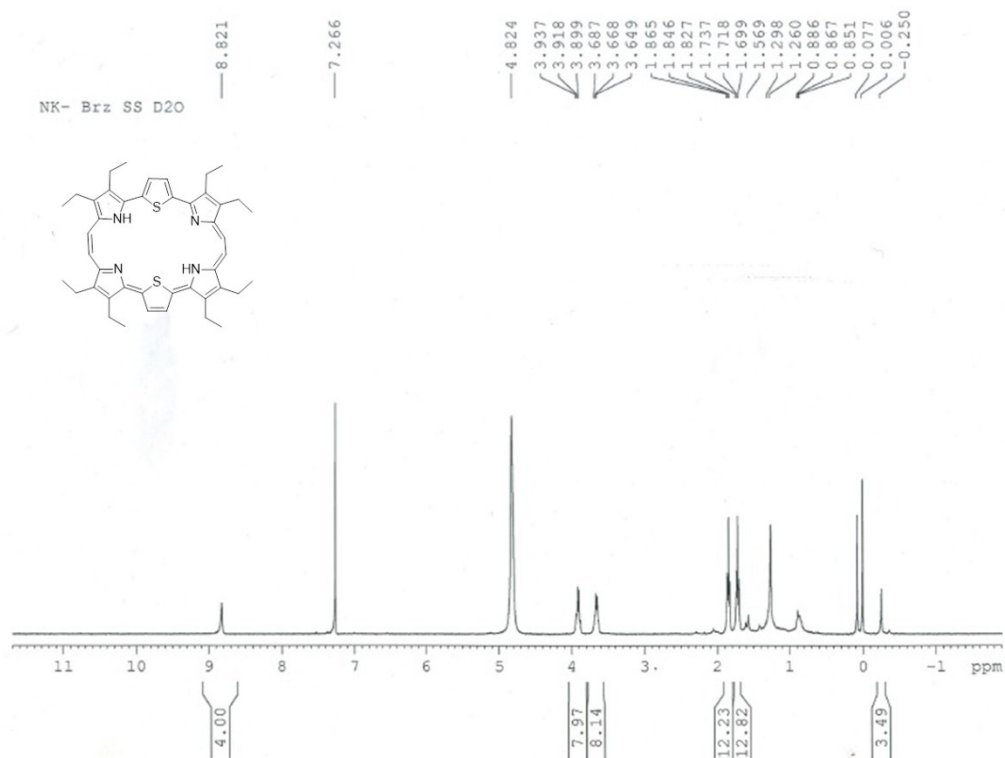

**Figure S7:**  $^1\text{H}$  NMR spectrum of **8** in  $\text{CDCl}_3 + \text{D}_2\text{O}$ .

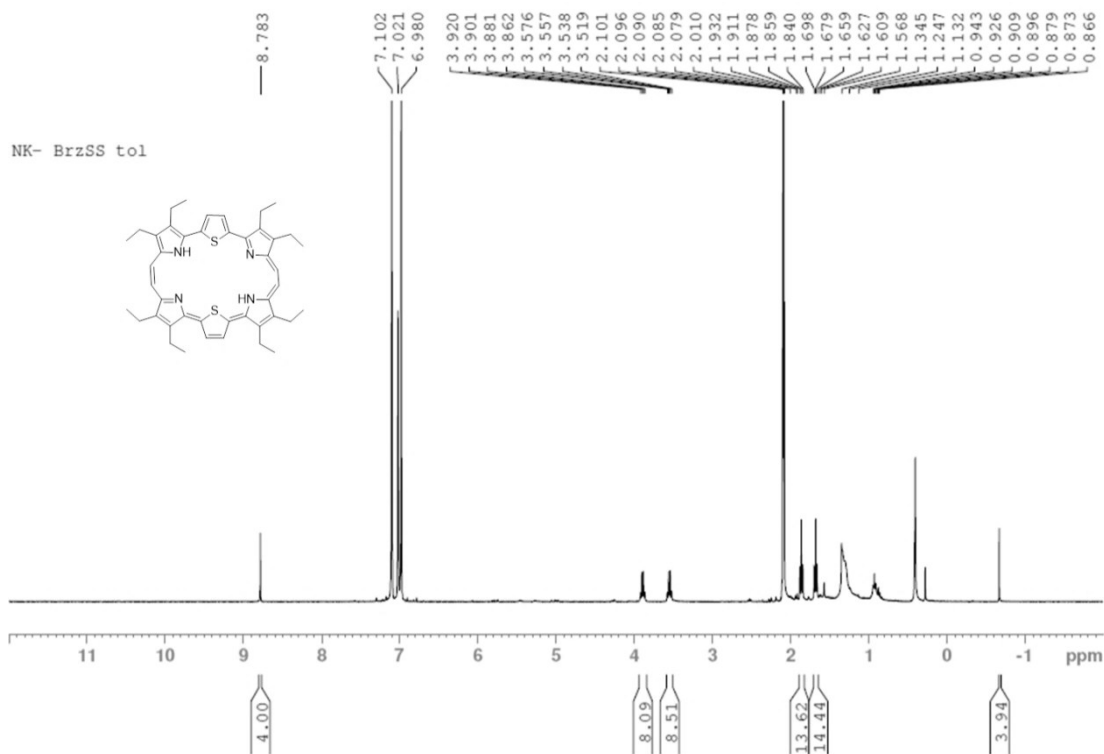

Figure S8:  $^1\text{H}$  NMR spectrum of 8 at RT in toluene- $d_8$ .

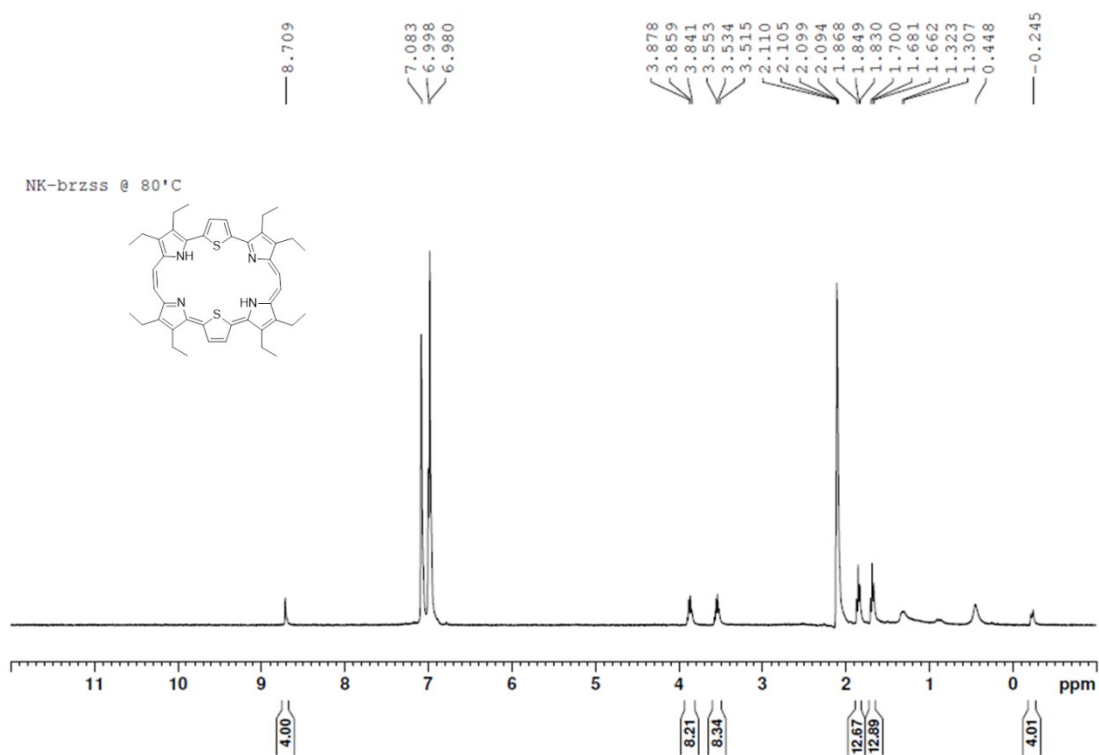

Figure S9:  $^1\text{H}$  NMR spectrum of 8 at 80°C in toluene- $d_8$ .

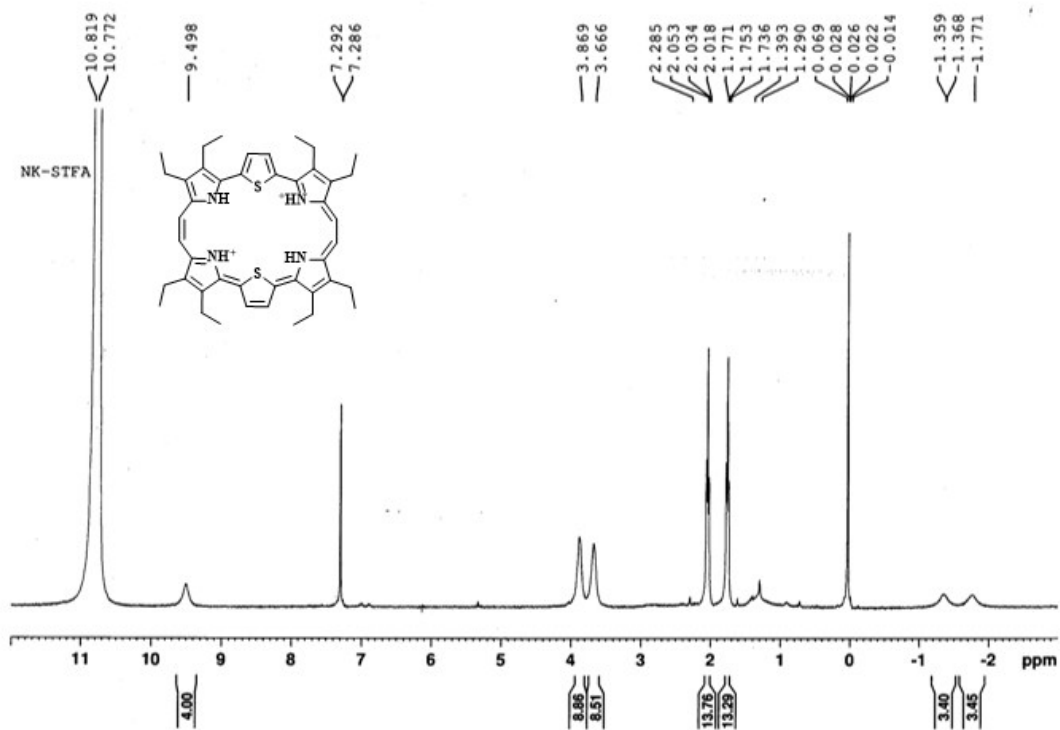

**Figure S10:**  $^1\text{H}$  NMR spectrum of **8** in  $\text{CDCl}_3 + \text{TFA}$ .

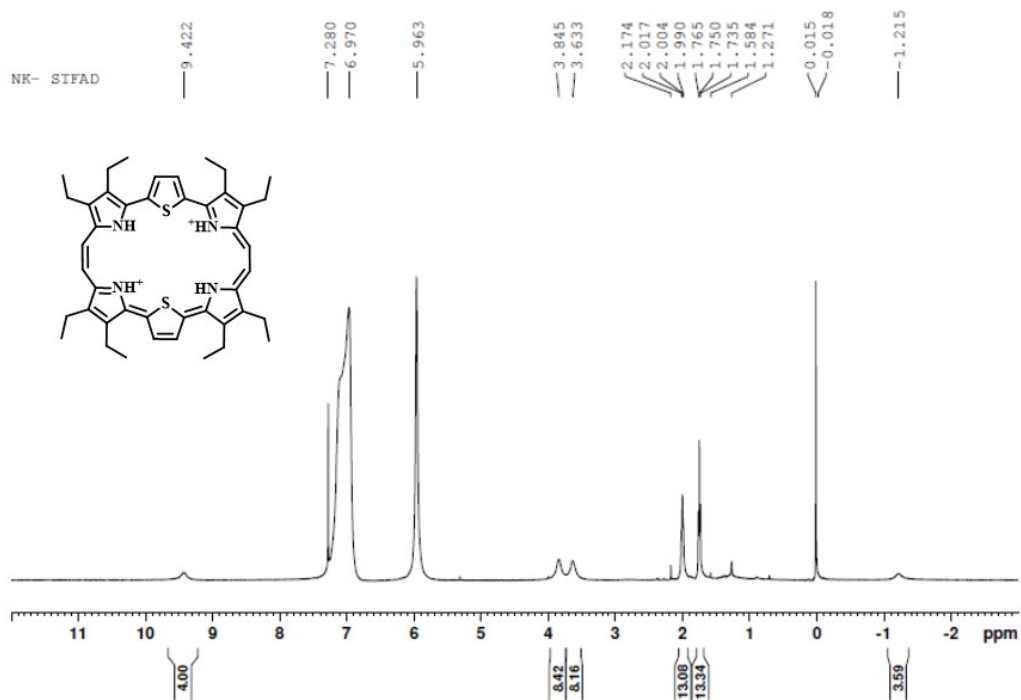

**Figure S11:**  $^1\text{H}$  NMR spectrum of **8** in  $\text{CDCl}_3 + \text{TFA} + \text{D}_2\text{O}$ .

BRUKER MAXIS HRMS REPORT  
SCHOOL OF CHEMISTRY

|                      |                                          |                  |                       |
|----------------------|------------------------------------------|------------------|-----------------------|
| <b>Analysis Info</b> |                                          | Acquisition Date | 10/3/2012 12:35:36 PM |
| Analysis Name        | D:\Data\2012\Dr.P.K.Pandal\OCTNK-BRZSS.d | Operator         | UOH                   |
| Method               | tune_low_Pos-R2.m                        | Instrument       | maXis 10138           |
| Sample Name          | NK-BRZSS                                 |                  |                       |
| Comment              |                                          |                  |                       |

|                              |            |                       |           |                  |           |
|------------------------------|------------|-----------------------|-----------|------------------|-----------|
| <b>Acquisition Parameter</b> |            |                       |           |                  |           |
| Source Type                  | ESI        | Ion Polarity          | Positive  | Set Nebulizer    | 4.4 psi   |
| Focus                        | Not active | Set Capillary         | 3800 V    | Set Dry Heater   | 180 °C    |
| Scan Begin                   | 50 m/z     | Set End Plate Offset  | -500 V    | Set Dry Gas      | 4.0 l/min |
| Scan End                     | 2580 m/z   | Set Collision Cell RF | 350.0 Vpp | Set Divert Valve | Waste     |

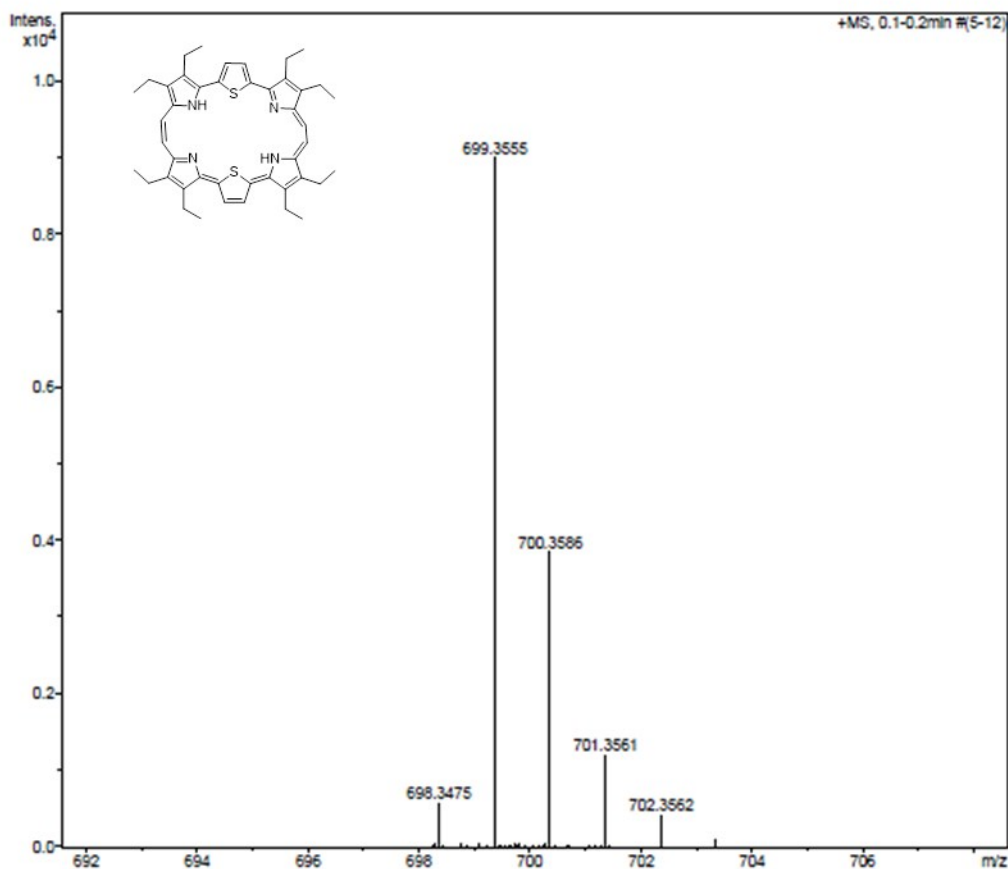

Bruker Compass DataAnalysis 4.0

printed: 10/3/2012 12:42:36 PM

Page 1 of 1

**Figure S12:** HRMS spectrum of **8** (M+H)<sup>+</sup>; Calculated for C<sub>44</sub>H<sub>51</sub>N<sub>4</sub>S<sub>2</sub>: 699.3555; found: 699.3555.

#### 4. Computational Studies:

Quantum mechanical calculations were performed using Gaussian 09 program provided by CMSD facility of University of Hyderabad.<sup>S6</sup> All calculations were carried out by density functional theory (DFT) with Becke's three-parameter hybrid exchange functional and the Lee-Yang-Parr correlation functional (B3LYP) was used. The cc-pVDZ and 6-31G basis sets were used for all the calculations and the molecular orbitals were visualized using Gauss view 5. The NICS values were obtained with gauge independent atomic orbital (GIAO) method and HOMA (Harmonic Oscillator Model of Aromaticity) was calculated by using  $R_{opt}(C-C) = 1.388 \text{ \AA}$  and  $R_{opt}(C-N) = 1.334 \text{ \AA}$ .

#### Optimization results of normal and inverted conformers and their coordinates for the two bronzaphyrins **8** and **4a**:

**Table S1:** Comparative stabilities of the two different conformers of **8** after structure optimization

| Conformer | Top view                                                                            | Side view                                                                            | Total Energy difference (in eV) |
|-----------|-------------------------------------------------------------------------------------|--------------------------------------------------------------------------------------|---------------------------------|
| Normal    | 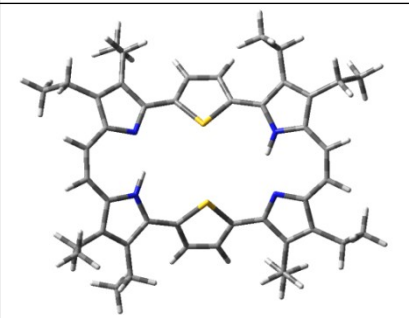  |   | 0.14                            |
| Inverted  |  |  | 0                               |

**Table S2:** Coordinates of the optimized structure of normal isomer of **8**

| Atom Label | Symbol | X        | Y        | Z        | Atom Label | Symbol | X        | Y        | Z        |
|------------|--------|----------|----------|----------|------------|--------|----------|----------|----------|
| 1          | C      | 1.356197 | 2.762181 | 0.514457 | 51         | H      | 1.300718 | 4.526094 | 1.818073 |
| 2          | C      | 0.743953 | 3.815149 | 1.215675 | 52         | H      | -1.26264 | 4.569608 | 1.631579 |
| 3          | C      | -0.64383 | 3.84066  | 1.114261 | 53         | H      | -2.81063 | 0.488568 | -0.22663 |
| 4          | C      | -1.18384 | 2.802045 | 0.339086 | 54         | H      | -1.23657 | -4.47201 | 1.946468 |
| 5          | S      | 0.115593 | 1.760395 | -0.24581 | 55         | H      | 1.320506 | -4.5297  | 1.685238 |
| 6          | C      | 2.740405 | 2.527579 | 0.277097 | 56         | H      | 2.817412 | -0.49958 | -0.29184 |
| 7          | C      | -2.5481  | 2.651589 | -0.04227 | 57         | H      | 6.409315 | 1.081259 | -1.31083 |
| 8          | N      | 3.207044 | 1.356196 | -0.2325  | 58         | H      | -6.42599 | -1.09745 | -1.13118 |
| 9          | C      | 4.528067 | 1.568491 | -0.51044 | 59         | H      | 6.325005 | -1.17587 | -1.60772 |
| 10         | C      | 4.921256 | 2.933294 | -0.16958 | 60         | H      | -6.34621 | 1.154036 | -1.47035 |
| 11         | C      | 3.803485 | 3.536833 | 0.362199 | 61         | H      | 5.667983 | -4.81066 | -1.68841 |
| 12         | C      | -3.49668 | 3.7044   | -0.28903 | 62         | H      | 6.374209 | -3.26587 | -2.12653 |
| 13         | C      | -4.65032 | 3.107406 | -0.79294 | 63         | H      | 7.856879 | -4.48181 | -0.52    |
| 14         | C      | -4.43476 | 1.691004 | -0.8068  | 64         | H      | 7.249431 | -2.98795 | 0.244397 |
| 15         | N      | -3.14738 | 1.461606 | -0.37908 | 65         | H      | 6.538806 | -4.55641 | 0.679846 |
| 16         | C      | -1.32581 | -2.74824 | 0.592132 | 66         | H      | 4.276208 | -5.69703 | -0.23181 |
| 17         | C      | -0.69549 | -3.78064 | 1.307861 | 67         | H      | 2.89958  | -5.44909 | 0.814184 |
| 18         | C      | 0.688747 | -3.81155 | 1.167959 | 68         | H      | 2.278847 | -6.89185 | -1.12753 |
| 19         | C      | 1.208215 | -2.79891 | 0.347493 | 69         | H      | 1.370555 | -5.36152 | -1.22933 |
| 20         | S      | -0.10585 | -1.77265 | -0.23194 | 70         | H      | 2.788953 | -5.62048 | -2.27001 |
| 21         | C      | -2.7159  | -2.51848 | 0.384795 | 71         | H      | -2.71992 | -5.38426 | 0.728972 |
| 22         | C      | 2.56258  | -2.65988 | -0.07686 | 72         | H      | -4.45845 | -5.54373 | 0.56283  |
| 23         | N      | -3.19504 | -1.35796 | -0.13711 | 73         | H      | -3.73323 | -6.10346 | 2.891993 |
| 24         | C      | -4.52291 | -1.57447 | -0.37654 | 74         | H      | -4.81954 | -4.68992 | 2.892795 |
| 25         | C      | -4.90721 | -2.93165 | 0.001768 | 75         | H      | -3.07723 | -4.45891 | 3.107825 |
| 26         | C      | -3.77603 | -3.52495 | 0.5174   | 76         | H      | -6.7309  | -3.22395 | -1.08923 |
| 27         | C      | 3.509583 | -3.71443 | -0.32369 | 77         | H      | -6.19997 | -4.62638 | -0.17441 |
| 28         | C      | 4.6525   | -3.12077 | -0.85668 | 78         | H      | -8.23294 | -3.61322 | 0.865957 |
| 29         | C      | 4.434173 | -1.70504 | -0.88413 | 79         | H      | -6.85319 | -3.48509 | 1.98911  |
| 30         | N      | 3.153695 | -1.47341 | -0.43831 | 80         | H      | -7.38326 | -2.05845 | 1.074659 |
| 31         | C      | 5.448703 | 0.6376   | -1.03822 | 81         | H      | 6.716312 | 3.204967 | -1.31248 |
| 32         | C      | -5.45682 | -0.6513  | -0.89518 | 82         | H      | 6.209366 | 4.623822 | -0.40962 |
| 33         | C      | 5.404231 | -0.73952 | -1.21438 | 83         | H      | 8.268293 | 3.628424 | 0.595709 |
| 34         | C      | -5.41507 | 0.722319 | -1.09685 | 84         | H      | 6.918123 | 3.521761 | 1.756438 |
| 35         | C      | 5.916955 | -3.81493 | -1.28716 | 85         | H      | 7.424207 | 2.078264 | 0.854831 |
| 36         | C      | 6.950781 | -3.96948 | -0.15707 | 86         | H      | 2.756927 | 5.403412 | 0.561987 |
| 37         | C      | 3.294419 | -5.20069 | -0.18284 | 87         | H      | 4.491557 | 5.553894 | 0.354997 |
| 38         | C      | 2.378509 | -5.8024  | -1.26355 | 88         | H      | 3.8205   | 6.158519 | 2.689034 |
| 39         | C      | -3.6751  | -4.93258 | 1.040514 | 89         | H      | 4.901736 | 4.741029 | 2.691207 |

|    |   |          |          |          |     |   |          |          |          |
|----|---|----------|----------|----------|-----|---|----------|----------|----------|
| 40 | C | -3.83197 | -5.05401 | 2.568014 | 90  | H | 3.163835 | 4.520688 | 2.949349 |
| 41 | C | -6.28232 | -3.52803 | -0.12763 | 91  | H | -2.22289 | 5.43151  | -0.24418 |
| 42 | C | -7.24354 | -3.1497  | 1.014824 | 92  | H | -3.81697 | 5.716546 | -0.9232  |
| 43 | C | 6.292666 | 3.526479 | -0.34522 | 93  | H | -3.60424 | 6.815378 | 1.313615 |
| 44 | C | 7.28304  | 3.168316 | 0.778683 | 94  | H | -4.86653 | 5.557044 | 1.361537 |
| 45 | C | 3.717215 | 4.954279 | 0.861013 | 95  | H | -3.28221 | 5.240065 | 2.085412 |
| 46 | C | 3.908358 | 5.102988 | 2.382148 | 96  | H | -5.96745 | 4.793952 | -0.79353 |
| 47 | C | -3.28796 | 5.185834 | -0.11467 | 97  | H | -6.78626 | 3.249561 | -0.95372 |
| 48 | C | -3.78563 | 5.73079  | 1.236429 | 98  | H | -6.85719 | 4.506229 | -3.11481 |
| 49 | C | -5.89164 | 3.807631 | -1.27742 | 99  | H | -5.89596 | 3.01794  | -3.32359 |
| 50 | C | -5.93375 | 3.989631 | -2.80567 | 100 | H | -5.07531 | 4.584113 | -3.15823 |

**Table S3:** Coordinates of the optimized structure of inverted isomer of **8**

| Atom Label | Symbol | X        | Y        | Z        | Atom Label | Symbol | X        | Y        | Z        |
|------------|--------|----------|----------|----------|------------|--------|----------|----------|----------|
| 1          | C      | -4.66343 | 1.719688 | -0.10102 | 51         | H      | -1.2897  | 0.408667 | -1.61547 |
| 2          | C      | -4.74255 | 3.174233 | 0.012838 | 52         | H      | 1.321214 | 0.356135 | -1.62151 |
| 3          | C      | -3.44596 | 3.646788 | -0.10111 | 53         | H      | 3.154255 | 0.256522 | -0.15183 |
| 4          | C      | -2.61754 | 2.471416 | -0.32163 | 54         | H      | -6.82063 | 3.55409  | -0.35667 |
| 5          | N      | -3.37054 | 1.341501 | -0.29996 | 55         | H      | -5.84976 | 5.001564 | -0.13382 |
| 6          | C      | -1.22026 | 2.319988 | -0.58176 | 56         | H      | -7.34879 | 4.627315 | 1.837612 |
| 7          | C      | -0.66034 | 1.185557 | -1.18745 | 57         | H      | -5.64107 | 4.500073 | 2.340336 |
| 8          | C      | 0.729091 | 1.16099  | -1.18886 | 58         | H      | -6.61078 | 3.027989 | 2.122291 |
| 9          | C      | 1.326346 | 2.280522 | -0.58958 | 59         | H      | -3.73899 | 5.698605 | 0.422975 |
| 10         | S      | 0.073422 | 3.413127 | -0.06546 | 60         | H      | -2.06333 | 5.181241 | 0.49674  |
| 11         | C      | 2.725498 | 2.400978 | -0.34158 | 61         | H      | -2.41856 | 6.706734 | -1.44971 |
| 12         | C      | 3.619737 | 3.513297 | -0.19611 | 62         | H      | -1.97433 | 5.085679 | -2.04199 |
| 13         | C      | 4.912914 | 2.985173 | -0.08916 | 63         | H      | -3.67026 | 5.616893 | -2.10744 |
| 14         | C      | 4.799239 | 1.551307 | -0.13639 | 64         | H      | 4.022297 | 5.555318 | -0.6903  |
| 15         | N      | 3.474602 | 1.256093 | -0.29566 | 65         | H      | 2.330866 | 5.091229 | -0.849   |
| 16         | C      | -5.99482 | 3.975697 | 0.242244 | 66         | H      | 2.637466 | 6.609099 | 1.106621 |
| 17         | C      | -6.42516 | 4.03674  | 1.719641 | 67         | H      | 2.117076 | 5.005589 | 1.683825 |
| 18         | C      | -2.98851 | 5.081122 | -0.09689 | 68         | H      | 3.820656 | 5.489509 | 1.831852 |
| 19         | C      | -2.74846 | 5.656152 | -1.50471 | 69         | H      | 6.976763 | 3.277932 | -0.58002 |
| 20         | C      | 3.222774 | 4.964633 | -0.21256 | 70         | H      | 6.068551 | 4.766807 | -0.34488 |
| 21         | C      | 2.933171 | 5.549885 | 1.181727 | 71         | H      | 7.66692  | 4.396243 | 1.543    |
| 22         | C      | 6.202095 | 3.746804 | 0.051006 | 72         | H      | 5.991991 | 4.337004 | 2.153267 |
| 23         | C      | 6.720595 | 3.832594 | 1.498618 | 73         | H      | 6.90027  | 2.829459 | 1.917188 |
| 24         | C      | -4.79645 | -1.54855 | 0.007641 | 74         | H      | -3.15193 | -0.25617 | 0.042599 |
| 25         | C      | -4.90804 | -2.98252 | -0.05109 | 75         | H      | -1.31532 | -0.35054 | 1.497307 |
| 26         | C      | -3.61727 | -3.51033 | 0.062984 | 76         | H      | 1.294486 | -0.4025  | 1.482768 |
| 27         | C      | -2.72432 | -2.40001 | 0.231424 | 77         | H      | -6.08767 | -4.7503  | 0.213548 |

|    |   |          |          |          |     |   |          |          |          |
|----|---|----------|----------|----------|-----|---|----------|----------|----------|
| 28 | N | -3.47415 | -1.25452 | 0.188884 | 78  | H | -6.99805 | -3.25167 | 0.33438  |
| 29 | C | -1.3244  | -2.27981 | 0.473941 | 79  | H | -7.56365 | -4.45001 | -1.78681 |
| 30 | C | -0.72482 | -1.15763 | 1.06657  | 80  | H | -6.76625 | -2.90019 | -2.16962 |
| 31 | C | 0.66428  | -1.18169 | 1.060422 | 81  | H | -5.8523  | -4.41871 | -2.29075 |
| 32 | C | 1.222826 | -2.31877 | 0.457675 | 82  | H | -4.00766 | -5.55591 | -0.41302 |
| 33 | S | -0.07232 | -3.41587 | -0.04749 | 83  | H | -2.30606 | -5.12782 | -0.46559 |
| 34 | C | 2.618837 | -2.47067 | 0.19358  | 84  | H | -2.77741 | -6.58027 | 1.511879 |
| 35 | C | 3.445698 | -3.64499 | -0.0371  | 85  | H | -2.25622 | -4.96919 | 2.067586 |
| 36 | C | 4.741978 | -3.17234 | -0.15549 | 86  | H | -3.97924 | -5.40882 | 2.11886  |
| 37 | C | 4.664133 | -1.71839 | -0.03428 | 87  | H | 3.736221 | -5.69366 | -0.57447 |
| 38 | N | 3.373256 | -1.34095 | 0.174752 | 88  | H | 2.060191 | -5.17616 | -0.63659 |
| 39 | C | -6.19095 | -3.74744 | -0.23128 | 89  | H | 2.426976 | -6.71331 | 1.299229 |
| 40 | C | -6.61912 | -3.8877  | -1.7037  | 90  | H | 1.983766 | -5.09625 | 1.902915 |
| 41 | C | -3.23521 | -4.96626 | 0.106227 | 91  | H | 3.68069  | -5.62573 | 1.956855 |
| 42 | C | -3.05136 | -5.51284 | 1.533385 | 92  | H | 5.849612 | -5.00042 | -0.02204 |
| 43 | C | 2.988367 | -5.07934 | -0.04713 | 93  | H | 6.822428 | -3.554   | 0.198684 |
| 44 | C | 2.755919 | -5.66266 | 1.358554 | 94  | H | 7.335237 | -4.62107 | -2.00238 |
| 45 | C | 5.992439 | -3.97344 | -0.39594 | 95  | H | 6.596522 | -3.02039 | -2.27726 |
| 46 | C | 6.412844 | -4.03021 | -1.87639 | 96  | H | 5.624283 | -4.49107 | -2.49326 |
| 47 | C | 5.824507 | 0.574567 | -0.07405 | 97  | H | 6.83393  | 0.991942 | -0.03584 |
| 48 | C | 5.762214 | -0.81951 | -0.0969  | 98  | H | 6.737973 | -1.31048 | -0.15125 |
| 49 | C | -5.76111 | 0.821073 | -0.0467  | 99  | H | -6.73791 | 1.311104 | -0.00347 |
| 50 | C | -5.82131 | -0.57355 | -0.07    | 100 | H | -6.82933 | -0.99261 | -0.12406 |

**Table S4:** Comparative stabilities of normal and inverted conformers of **4a** after structure optimization

| Conformer | Top view                                                                            | Side view                                                                            | Total Energy difference (in eV) |
|-----------|-------------------------------------------------------------------------------------|--------------------------------------------------------------------------------------|---------------------------------|
| Normal    | 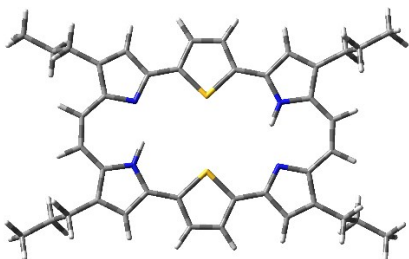 |  | 0                               |



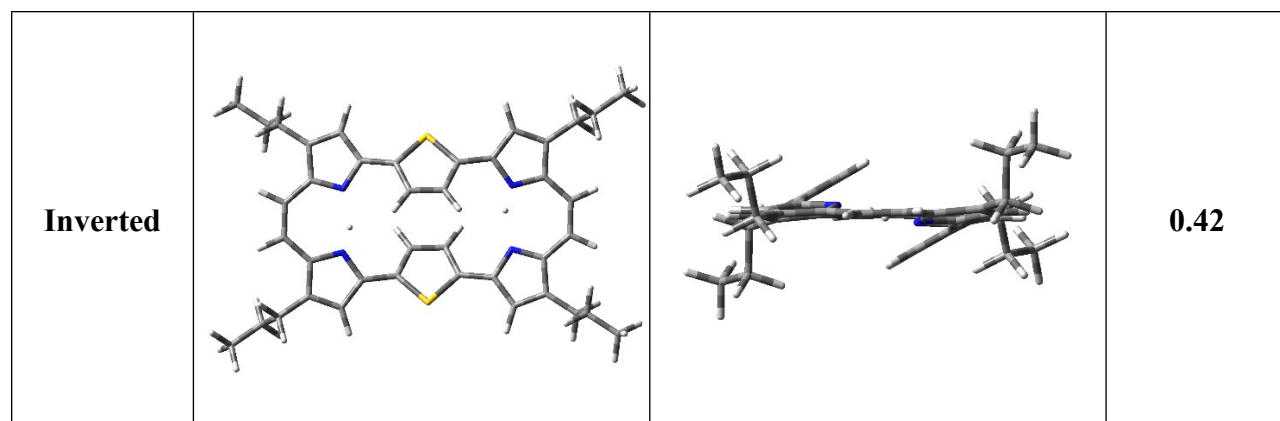

**Table S5:** Coordinates of the optimized structure of normal isomer of **4a**

| Atom Label | Symbol | X        | Y        | Z        | Atom Label | Symbol | X        | Y        | Z        |
|------------|--------|----------|----------|----------|------------|--------|----------|----------|----------|
| 1          | C      | -1.24259 | 2.935193 | -0.09702 | 45         | H      | -6.60216 | 1.26313  | 0.464867 |
| 2          | C      | -0.65175 | 4.202233 | -0.27435 | 46         | H      | 6.637746 | -1.22559 | -0.04757 |
| 3          | C      | 0.733117 | 4.185656 | -0.29766 | 47         | H      | -6.65402 | -0.99549 | 0.729914 |
| 4          | C      | 1.295646 | 2.902205 | -0.14345 | 48         | H      | 6.702024 | 1.046986 | -0.0693  |
| 5          | S      | 0.013384 | 1.708656 | 0.034943 | 49         | H      | -6.08112 | -4.63269 | 1.35577  |
| 6          | C      | -2.63375 | 2.67715  | -0.0152  | 50         | H      | -6.87793 | -3.07143 | 1.536808 |
| 7          | C      | 2.687085 | 2.638714 | -0.12539 | 51         | H      | -7.12268 | -2.9141  | -0.97503 |
| 8          | N      | -3.22449 | 1.466606 | 0.170776 | 52         | H      | -6.32461 | -4.47693 | -1.14343 |
| 9          | C      | -4.57177 | 1.720135 | 0.216994 | 53         | H      | 6.935499 | -3.31915 | 0.532888 |
| 10         | C      | -4.84656 | 3.150987 | 0.044613 | 54         | H      | 6.101148 | -4.84964 | 0.277614 |
| 11         | C      | 4.937199 | 3.032039 | -0.12795 | 55         | H      | 6.028882 | -4.41492 | -2.19387 |
| 12         | C      | 4.694721 | 1.615724 | -0.06512 | 56         | H      | 6.849758 | -2.87333 | -1.95926 |
| 13         | N      | 3.327468 | 1.423714 | -0.05801 | 57         | H      | -6.85868 | 3.410348 | 0.765268 |
| 14         | C      | 1.260903 | -2.92403 | 0.169649 | 58         | H      | -6.06014 | 4.891682 | 0.244067 |
| 15         | C      | 0.664241 | -4.19962 | 0.22157  | 59         | H      | -6.2201  | 4.151875 | -2.15004 |
| 16         | C      | -0.71701 | -4.17762 | 0.32425  | 60         | H      | -7.00877 | 2.658013 | -1.64821 |
| 17         | C      | -1.27094 | -2.88157 | 0.354487 | 61         | H      | 6.170197 | 4.714082 | -0.56026 |
| 18         | S      | 0.014883 | -1.68299 | 0.251297 | 62         | H      | 6.99125  | 3.166048 | -0.74769 |
| 19         | C      | 2.65176  | -2.6658  | 0.081992 | 63         | H      | 6.976452 | 2.866208 | 1.76462  |
| 20         | C      | -2.65687 | -2.60946 | 0.461192 | 64         | H      | 6.165966 | 4.422152 | 1.936565 |
| 21         | N      | 3.249246 | -1.44483 | 0.047015 | 65         | C      | 8.234814 | 4.570881 | 1.294609 |
| 22         | C      | 4.596246 | -1.69805 | -0.00974 | 66         | H      | 8.157084 | 5.584086 | 0.864332 |
| 23         | C      | 4.862852 | -3.14067 | -0.0195  | 67         | H      | 8.641734 | 4.671339 | 2.313443 |
| 24         | C      | -4.8961  | -2.98594 | 0.709312 | 68         | H      | 8.973706 | 4.013992 | 0.693223 |
| 25         | C      | -4.65586 | -1.57428 | 0.575643 | 69         | C      | -8.24334 | 4.42646  | -1.41072 |
| 26         | N      | -3.29475 | -1.39159 | 0.433904 | 70         | H      | -8.14362 | 5.500929 | -1.1797  |
| 27         | C      | -5.61548 | 0.795742 | 0.42315  | 71         | H      | -8.71931 | 4.341151 | -2.40085 |
| 28         | C      | 5.648825 | -0.76118 | -0.03574 | 72         | H      | -8.9366  | 3.99404  | -0.66878 |
| 29         | C      | -5.65264 | -0.58488 | 0.582585 | 73         | C      | -8.317   | -4.59066 | -0.28827 |

|    |   |          |          |          |    |   |          |          |          |
|----|---|----------|----------|----------|----|---|----------|----------|----------|
| 30 | C | 5.693331 | 0.628386 | -0.05007 | 74 | H | -8.82564 | -4.74273 | -1.25363 |
| 31 | C | -6.23144 | -3.65801 | 0.860968 | 75 | H | -8.19048 | -5.58074 | 0.182152 |
| 32 | C | -6.97207 | -3.88553 | -0.47251 | 76 | H | -8.99334 | -4.00388 | 0.356732 |
| 33 | C | 6.198083 | -3.82368 | -0.11686 | 77 | C | 8.11521  | -4.6034  | -1.62211 |
| 34 | C | 6.760983 | -3.89535 | -1.55116 | 78 | H | 8.04681  | -5.63934 | -1.24801 |
| 35 | C | -6.1886  | 3.825282 | -0.00887 | 79 | H | 8.492881 | -4.64662 | -2.65634 |
| 36 | C | -6.88563 | 3.722155 | -1.38098 | 80 | H | 8.873181 | -4.08319 | -1.01146 |
| 37 | C | 6.276386 | 3.71323  | -0.10844 | 81 | C | 3.700833 | 3.643692 | -0.17072 |
| 38 | C | 6.878236 | 3.864468 | 1.303582 | 82 | H | 3.517194 | 4.713579 | -0.22026 |
| 39 | H | -1.24057 | 5.110866 | -0.38317 | 83 | C | 3.634572 | -3.73383 | 0.039113 |
| 40 | H | 1.339421 | 5.079603 | -0.43212 | 84 | C | -3.62214 | 3.737357 | -0.10023 |
| 41 | H | 2.936899 | 0.46173  | -0.02299 | 85 | C | -3.66537 | -3.60588 | 0.632635 |
| 42 | H | 1.246443 | -5.11817 | 0.18324  | 86 | H | -3.48077 | -4.6742  | 0.706381 |
| 43 | H | -1.32771 | -5.07761 | 0.369324 | 87 | H | -3.42176 | 4.796886 | -0.24397 |
| 44 | H | -2.90665 | -0.43463 | 0.320923 | 88 | H | 3.429034 | -4.80193 | 0.056364 |

**Table S6:** Coordinates of the optimized structure of inverted isomer of **4a**

| Atom Label | Symbol | X        | Y        | Z        | Atom Label | Symbol | X        | Y        | Z        |
|------------|--------|----------|----------|----------|------------|--------|----------|----------|----------|
| 1          | S      | 0.104145 | 3.382268 | 0.047595 | 45         | C      | 1.13009  | -2.29107 | -0.69141 |
| 2          | N      | -3.31728 | 1.34439  | 0.622456 | 46         | C      | -3.63271 | -3.45792 | 0.183501 |
| 3          | N      | 3.501338 | 1.217217 | -0.08225 | 47         | C      | -1.39346 | -2.24068 | -0.44445 |
| 4          | C      | 4.904406 | 2.952087 | -0.44735 | 48         | C      | -4.79834 | -1.51447 | 0.400647 |
| 5          | C      | -3.36719 | 3.634239 | 0.443797 | 49         | C      | 2.542518 | -2.45817 | -0.57224 |
| 6          | C      | 4.61723  | -1.74566 | -0.55506 | 50         | C      | 0.52376  | -1.14916 | -1.23271 |
| 7          | C      | 5.800377 | 0.534044 | -0.61577 | 51         | C      | -2.76052 | -2.35889 | -0.05962 |
| 8          | H      | 6.798743 | 0.946785 | -0.78145 | 52         | C      | 5.916401 | -4.05125 | -0.35888 |
| 9          | C      | -4.67889 | 3.205334 | 0.456727 | 53         | H      | 5.680145 | -5.07498 | -0.696   |
| 10         | C      | 0.858791 | 1.119169 | 1.095002 | 54         | H      | 6.688857 | -3.6727  | -1.05261 |
| 11         | C      | -1.1301  | 2.291053 | 0.691302 | 55         | C      | -5.72785 | 0.860616 | 0.609949 |
| 12         | C      | 3.63273  | 3.45795  | -0.18348 | 56         | H      | -6.69676 | 1.3626   | 0.686056 |
| 13         | C      | 1.39347  | 2.240722 | 0.444476 | 57         | C      | 6.5152   | -4.12059 | 1.061252 |
| 14         | C      | 4.798359 | 1.514489 | -0.40052 | 58         | H      | 5.746634 | -4.50897 | 1.75235  |
| 15         | C      | -2.54252 | 2.458137 | 0.572109 | 59         | H      | 6.746184 | -3.09803 | 1.407853 |
| 16         | C      | -0.52376 | 1.149177 | 1.232664 | 60         | C      | -6.15977 | -3.74573 | 0.672829 |
| 17         | C      | 2.760535 | 2.358936 | 0.059682 | 61         | H      | -5.89133 | -4.72607 | 1.102171 |
| 18         | C      | -5.9164  | 4.051238 | 0.358846 | 62         | H      | -6.79149 | -3.24483 | 1.427213 |
| 19         | H      | -5.68012 | 5.074978 | 0.695915 | 63         | C      | -6.99104 | -3.97173 | -0.60675 |
| 20         | H      | -6.68882 | 3.672715 | 1.052631 | 64         | H      | -6.35993 | -4.48032 | -1.35652 |
| 21         | C      | 5.727851 | -0.86062 | -0.60986 | 65         | H      | -7.25387 | -2.99287 | -1.04514 |
| 22         | H      | 6.696755 | -1.3626  | -0.68594 | 66         | H      | -1.49    | -0.31203 | -1.46335 |
| 23         | C      | -6.51529 | 4.120527 | -1.06126 | 67         | H      | 1.112675 | -0.37404 | -1.7178  |
| 24         | H      | -5.74676 | 4.508885 | -1.75241 | 68         | H      | -3.16053 | -0.22124 | 0.22609  |

|    |   |          |          |          |    |   |          |          |          |
|----|---|----------|----------|----------|----|---|----------|----------|----------|
| 25 | H | -6.74629 | 3.097953 | -1.40781 | 69 | H | 3.355099 | 4.508416 | -0.11837 |
| 26 | C | 6.159802 | 3.745728 | -0.6728  | 70 | H | -3.01629 | 4.664759 | 0.402431 |
| 27 | H | 5.891358 | 4.726046 | -1.10218 | 71 | H | -3.35508 | -4.50838 | 0.118322 |
| 28 | H | 6.791514 | 3.244787 | -1.42716 | 72 | H | 3.016296 | -4.66479 | -0.40263 |
| 29 | C | 6.991072 | 3.971784 | 0.60677  | 73 | C | -8.26025 | -4.78669 | -0.35221 |
| 30 | H | 6.359964 | 4.480411 | 1.356517 | 74 | H | -8.83332 | -4.93751 | -1.28102 |
| 31 | H | 7.253897 | 2.99294  | 1.045206 | 75 | H | -8.02193 | -5.78258 | 0.058769 |
| 32 | H | 1.490014 | 0.312108 | 1.463447 | 76 | H | -8.92356 | -4.28227 | 0.37119  |
| 33 | H | -1.11268 | 0.374059 | 1.717763 | 77 | C | 7.770856 | -4.99145 | 1.132214 |
| 34 | H | 3.160573 | 0.221242 | -0.22576 | 78 | H | 8.175919 | -5.03062 | 2.156155 |
| 35 | S | -0.10415 | -3.38228 | -0.04769 | 79 | H | 7.558574 | -6.0274  | 0.816874 |
| 36 | N | 3.317278 | -1.34442 | -0.62257 | 80 | H | 8.56656  | -4.60382 | 0.472979 |
| 37 | N | -3.50131 | -1.21718 | 0.082447 | 81 | C | 8.260287 | 4.786719 | 0.352197 |
| 38 | C | -4.90438 | -2.95207 | 0.447415 | 82 | H | 8.021971 | 5.7826   | -0.05883 |
| 39 | C | 3.367192 | -3.63427 | -0.44396 | 83 | H | 8.833353 | 4.937577 | 1.280993 |
| 40 | C | -4.61723 | 1.745639 | 0.55504  | 84 | H | 8.923594 | 4.282265 | -0.37118 |
| 41 | C | -5.80037 | -0.53405 | 0.615911 | 85 | C | -7.77095 | 4.991387 | -1.13217 |
| 42 | H | -6.79873 | -0.94679 | 0.78159  | 86 | H | -7.55865 | 6.027343 | -0.81688 |
| 43 | C | 4.678886 | -3.20535 | -0.45681 | 87 | H | -8.17607 | 5.030516 | -2.15609 |
| 44 | C | -0.85879 | -1.11912 | -1.09496 | 88 | H | -8.56661 | 4.603779 | -0.47288 |

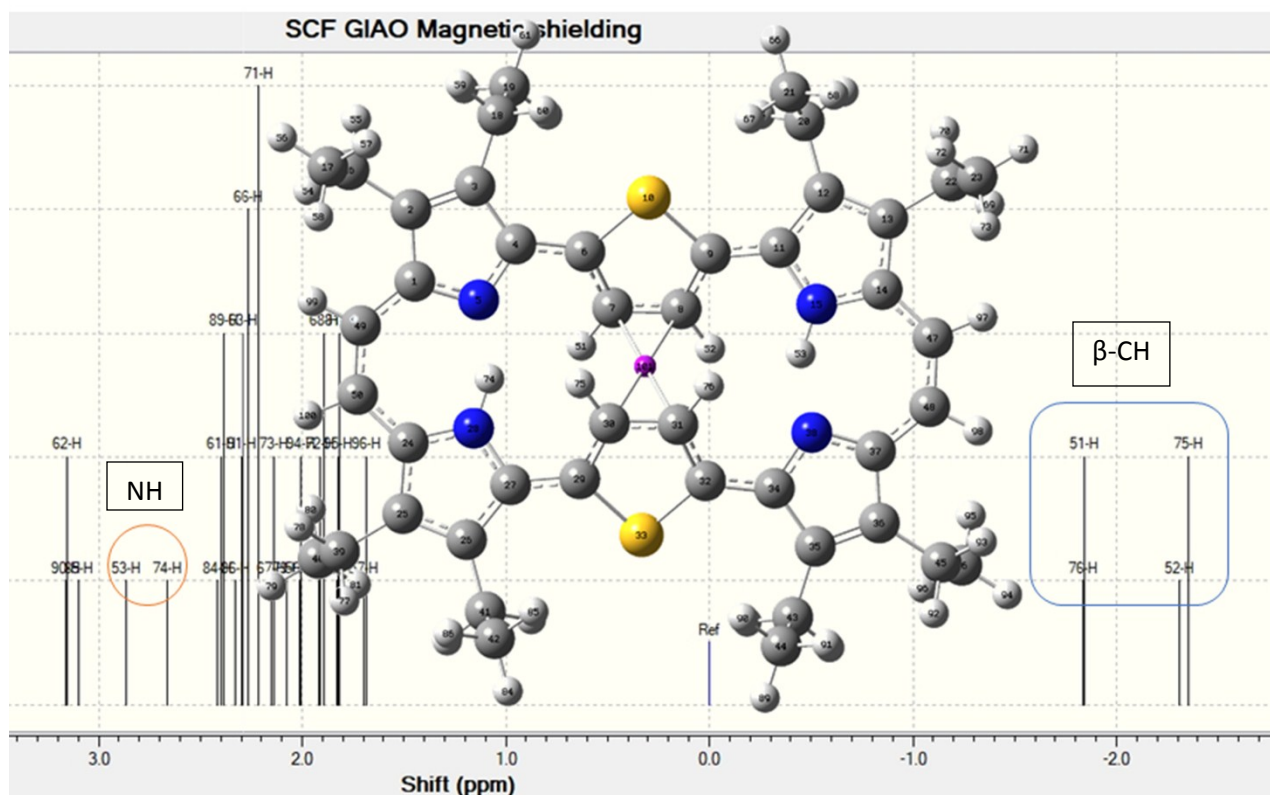

**Figure S13:** Theoretical  $^1\text{H}$  NMR spectrum of **8** indicating NH and  $\beta$ -CH of thiophene.

**MOs and energy levels of bronzaphyrins **8** and  $8.H_2^{2+}$ :**

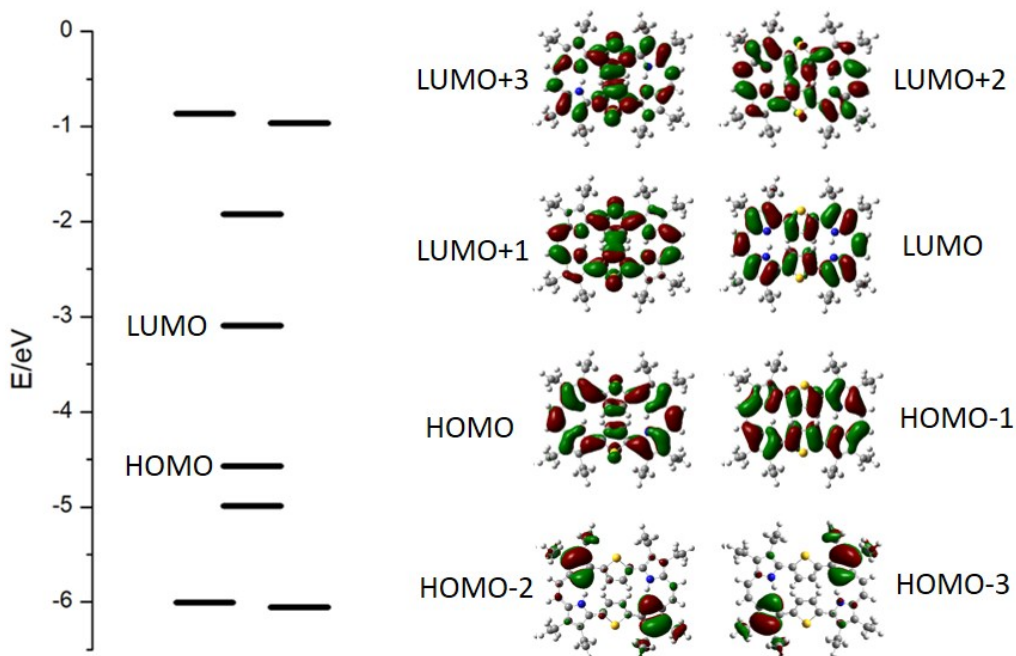

**Figure S14:** Delocalized electron densities of selected MOs of **8** with energy level diagram.

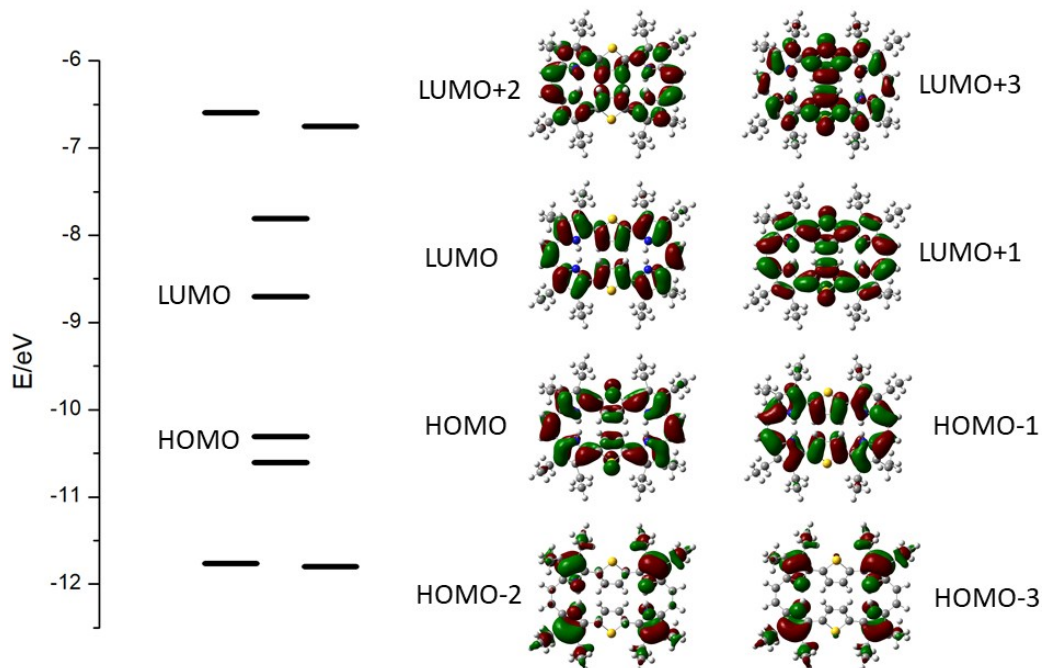

**Figure S15:** Delocalized electron densities of selected MOs of  $8.H_2^{2+}$  with energy level diagram.

**NICS and HOMA calculation results:**

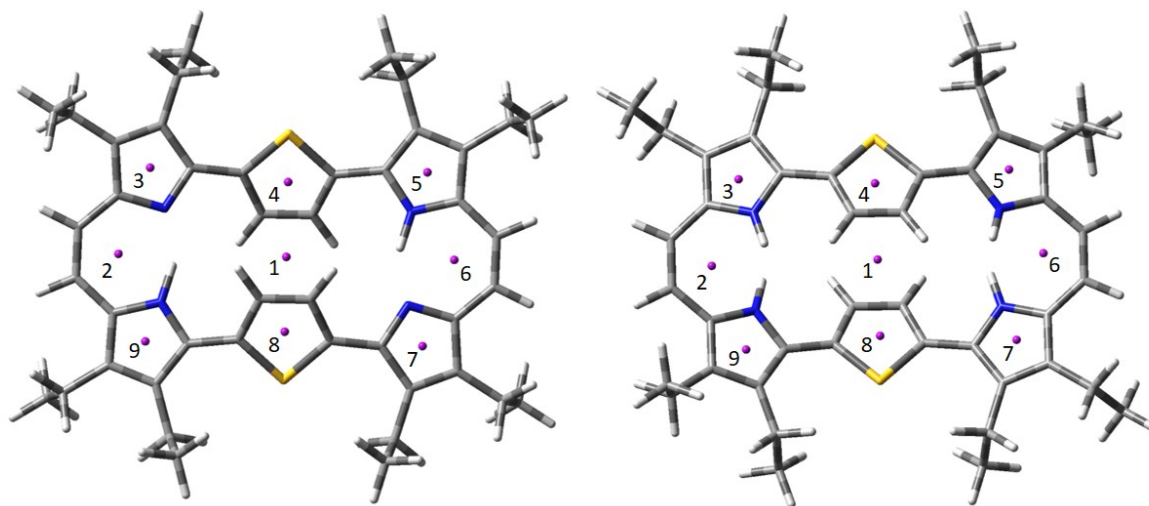

**Figure S16:** Selected positions for calculating NICS values of compounds **8** and **8.H<sub>2</sub><sup>2+</sup>**. 1-9 represent the ghost **Bq** atoms

**Table S7:** NICS values of selected positions of compounds **8** and **8.H<sub>2</sub><sup>2+</sup>**.

| <b>Bq atom no.</b> | <b>8</b> | <b>8.H<sub>2</sub><sup>2+</sup></b> |
|--------------------|----------|-------------------------------------|
| 1                  | -18.5    | -18.3                               |
| 2                  | -16.2    | -18.8                               |
| 3                  | -2.4     | -11.9                               |
| 4                  | -8.7     | -9.3                                |
| 5                  | -11.1    | -12.9                               |
| 6                  | -16.1    | -18.8                               |
| 7                  | -2.4     | -11.9                               |
| 8                  | -8.3     | -9.3                                |
| 9                  | -10.7    | -12.9                               |

**Table S8:** Summary of **HOMA**<sup>\*</sup> index values (\* = calculated by considering the conjugation path of 26π e).  $\Delta R_x$  = Bond length alteration from the crystal structure.

| <b>Molecule</b>                     | <b>π-e</b> | <b><math>\Delta R_x</math> (Å)</b> | <b>HOMA</b> |
|-------------------------------------|------------|------------------------------------|-------------|
| <b>8</b>                            | 26         | 0.106                              | 0.75        |
| <b>8.H<sub>2</sub><sup>2+</sup></b> | 26         | 0.075                              | 0.75        |

**Table S9: Selected transitions, oscillator strength, symmetry calculated (H = HOMO, L = LUMO) from DFT analysis for bronzaphyrin 8**

| S. No. | Wavelength (nm) | Oscillator strength | Symmetry  | Major contributors                         |
|--------|-----------------|---------------------|-----------|--------------------------------------------|
| 1      | 810.401         | 0.4128              | Singlet-A | H-1->L+1 (11%), H->L (85%)                 |
| 2      | 761.100         | 0.1204              | Singlet-A | H-1->L (73%), H->L+1 (20%)                 |
| 3      | 483.780         | 0.425               | Singlet-A | H-3->L (37%), H-1->L (18%), H->L+1 (44%)   |
| 4      | 423.4403        | 0.2607              | Singlet-A | H-5->L (63%), H-1->L+1 (25%)               |
| 5      | 414.687         | 1.1666              | Singlet-A | H-6->L (11%), H-5->L (18%), H-1->L+1 (60%) |

**Table S10: Selected transitions, oscillator strength, symmetry calculated (H = HOMO, L = LUMO) from DFT analysis for bronzaphyrin 8.H<sub>2</sub><sup>2+</sup>**

| S. No. | Wavelength (nm) | Oscillator strength | Symmetry  | Major contributors         |
|--------|-----------------|---------------------|-----------|----------------------------|
| 1      | 802.845         | 0.2895              | Singlet-A | H-1->L+1 (20%), H->L (82%) |
| 2      | 771.857         | 0.0569              | Singlet-A | H-1->L (71%), H->L+1 (29%) |
| 3      | 496.868         | 0.6741              | Singlet-A | H-1->L (33%), H->L+1 (72%) |
| 4      | 439.673         | 1.701               | Singlet-A | H-1->L+1 (79%), H->L (23%) |
| 5      | 383.019         | 0.082               | Singlet-A | H-8->L (98%)               |
| 6      | 352.015         | 0.071               | Singlet-A | H-3->L+1 (98%)             |

## 5. Crystallographic parameters for 8 and 8. H<sub>2</sub><sup>2+</sup>

### Crystal data and structure refinement for 8

|                                   |                                                                                                                                                      |
|-----------------------------------|------------------------------------------------------------------------------------------------------------------------------------------------------|
| Identification code               | BrzSS                                                                                                                                                |
| Empirical formula                 | C <sub>44</sub> H <sub>50</sub> N <sub>4</sub> S <sub>2</sub>                                                                                        |
| Formula weight                    | 699.00                                                                                                                                               |
| Temperature                       | 298(2) K                                                                                                                                             |
| Wavelength                        | 1.54184 Å                                                                                                                                            |
| Crystal system                    | Triclinic                                                                                                                                            |
| Space group                       | <i>P</i> -1                                                                                                                                          |
| Unit cell dimensions              | $a = 8.7071(7)$ Å $\alpha = 98.972(5)^\circ$ .<br>$b = 9.6083(5)$ Å $\beta = 106.931(7)^\circ$ .<br>$c = 12.2192(8)$ Å $\gamma = 103.162(6)^\circ$ . |
| Volume                            | 924.76(12) Å <sup>3</sup>                                                                                                                            |
| Z                                 | 1                                                                                                                                                    |
| Density (calculated)              | 1.255 Mg/m <sup>3</sup>                                                                                                                              |
| Absorption coefficient            | 1.581 mm <sup>-1</sup>                                                                                                                               |
| F(000)                            | 374                                                                                                                                                  |
| Crystal size                      | 0.18 x 0.16 x 0.14 mm <sup>3</sup>                                                                                                                   |
| Theta range for data collection   | 3.894 to 70.066°.                                                                                                                                    |
| Index ranges                      | -10 ≤ <i>h</i> ≤ 9, -8 ≤ <i>k</i> ≤ 11, -14 ≤ <i>l</i> ≤ 14                                                                                          |
| Reflections collected             | 5814                                                                                                                                                 |
| Independent reflections           | 3487 [R(int) = 0.0325]                                                                                                                               |
| Completeness to theta = 67.684°   | 99.8 %                                                                                                                                               |
| Absorption correction             | Semi-empirical from equivalents                                                                                                                      |
| Max. and min. transmission        | 1.00000 and 0.83196                                                                                                                                  |
| Refinement method                 | Full-matrix least-squares on F <sup>2</sup>                                                                                                          |
| Data / restraints / parameters    | 3487 / 0 / 230                                                                                                                                       |
| Goodness-of-fit on F <sup>2</sup> | 1.043                                                                                                                                                |
| Final R indices [I > 2σ(I)]       | R1 = 0.0489, wR2 = 0.1242                                                                                                                            |
| R indices (all data)              | R1 = 0.0616, wR2 = 0.1370                                                                                                                            |
| Largest diff. peak and hole       | 0.419 and -0.307 e.Å <sup>-3</sup>                                                                                                                   |

### Crystal data and structure refinement for 8. H<sub>2</sub><sup>2+</sup>

|                                   |                                                                                                             |
|-----------------------------------|-------------------------------------------------------------------------------------------------------------|
| Identification code               | BrzSStfa                                                                                                    |
| Empirical formula                 | C52 H54 F12 N4 O8 S2                                                                                        |
| Formula weight                    | 1155.11                                                                                                     |
| Temperature                       | 100(2) K                                                                                                    |
| Wavelength                        | 0.71073 Å                                                                                                   |
| Crystal system                    | Monoclinic                                                                                                  |
| Space group                       | P 21/c                                                                                                      |
| Unit cell dimensions              | a = 12.4875(4) Å      α = 90°.<br>b = 12.9069(4) Å      β = 98.0780(10)°.<br>c = 16.8517(6) Å      γ = 90°. |
| Volume                            | 2689.12(15) Å <sup>3</sup>                                                                                  |
| Z                                 | 2                                                                                                           |
| Density (calculated)              | 1.427 Mg/m <sup>3</sup>                                                                                     |
| Absorption coefficient            | 0.197 mm <sup>-1</sup>                                                                                      |
| F(000)                            | 1196                                                                                                        |
| Crystal size                      | 0.16 x 0.14 x 0.10 mm <sup>3</sup>                                                                          |
| Theta range for data collection   | 2.281 to 27.558°.                                                                                           |
| Index ranges                      | -16 ≤ h ≤ 16, -16 ≤ k ≤ 16, -21 ≤ l ≤ 21                                                                    |
| Reflections collected             | 69513                                                                                                       |
| Independent reflections           | 6206 [R(int) = 0.0526]                                                                                      |
| Completeness to theta = 25.242°   | 99.9 %                                                                                                      |
| Absorption correction             | Semi-empirical from equivalents                                                                             |
| Max. and min. transmission        | 0.7456 and 0.6669                                                                                           |
| Refinement method                 | Full-matrix least-squares on F <sup>2</sup>                                                                 |
| Data / restraints / parameters    | 6206 / 0 / 368                                                                                              |
| Goodness-of-fit on F <sup>2</sup> | 0.992                                                                                                       |
| Final R indices [I > 2σ(I)]       | R1 = 0.0605, wR2 = 0.1541                                                                                   |
| R indices (all data)              | R1 = 0.0751, wR2 = 0.1648                                                                                   |
| Extinction coefficient            | n/a                                                                                                         |
| Largest diff. peak and hole       | 1.892 and -1.039 e.Å <sup>-3</sup>                                                                          |



## 6. ORTEP Diagrams:

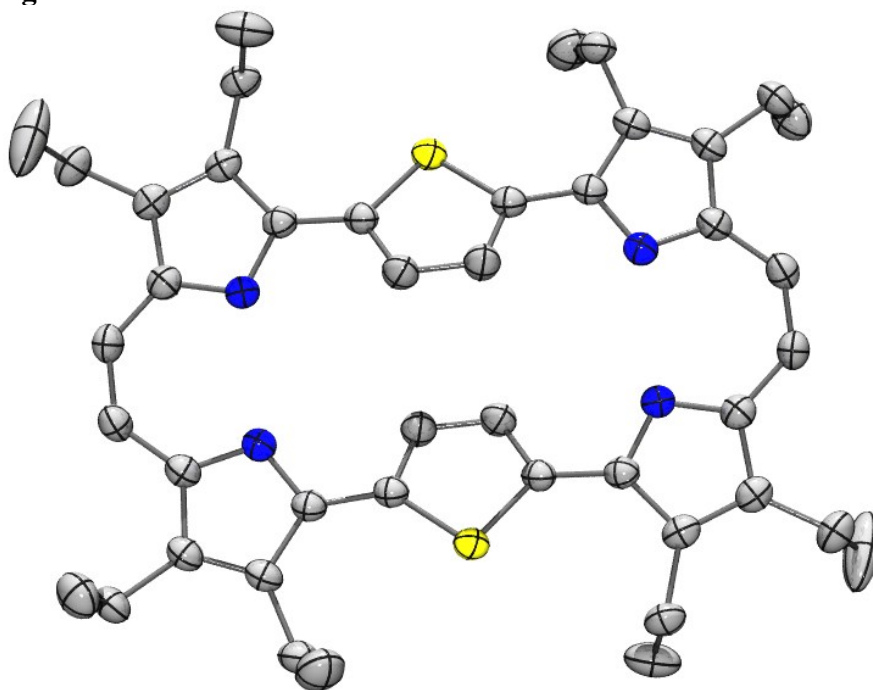

**Figure S17:** ORTEP-POVRAY diagram of **8** (top view). All hydrogens are excluded for clarity and thermal ellipsoids are scaled up to 50% probability level. Color code: grey = Carbon, blue = Nitrogen and yellow = Sulphur.

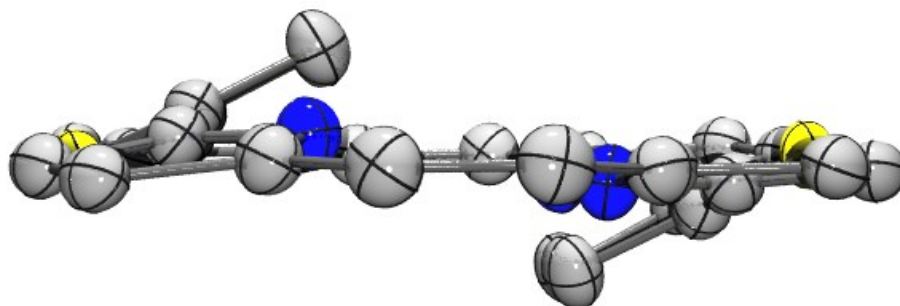

**Figure S18:** ORTEP-POVRAY diagram of **8** (side view). All hydrogens and ethyl groups are excluded for clarity and thermal ellipsoids are scaled up to 50% probability level. Color code: grey = Carbon, blue = Nitrogen and yellow = Sulphur.

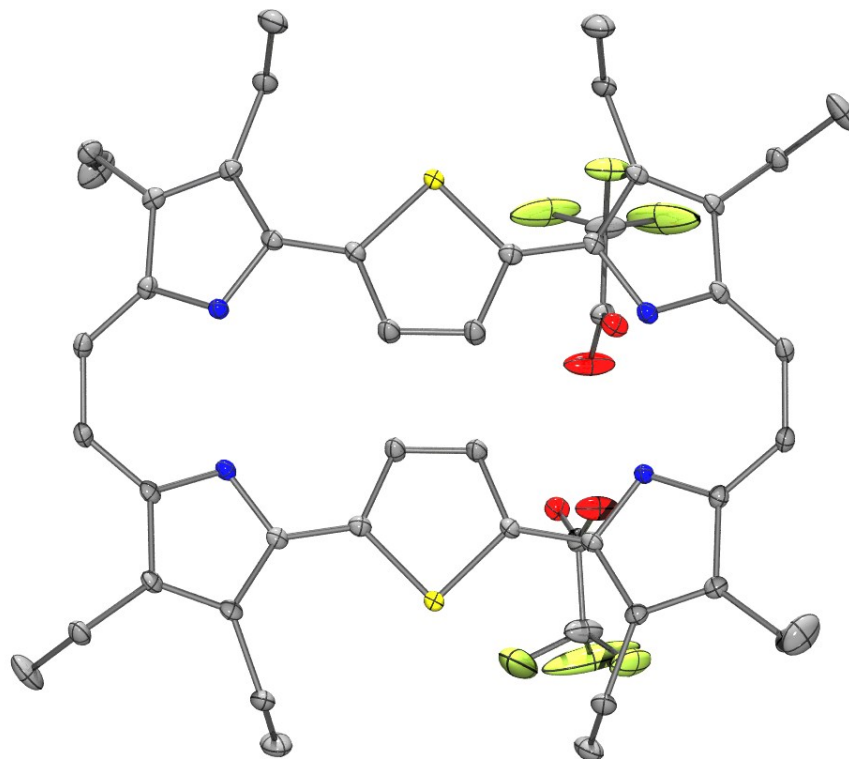

**Figure S19:** ORTEP-POVRAY diagram of  $8.H_2^{2+}$  (top view). All hydrogens are excluded for clarity and thermal ellipsoids are scaled up to 50% probability level. Color code: grey = Carbon, blue = Nitrogen, yellowish green = Fluorine and yellow = Sulphur.

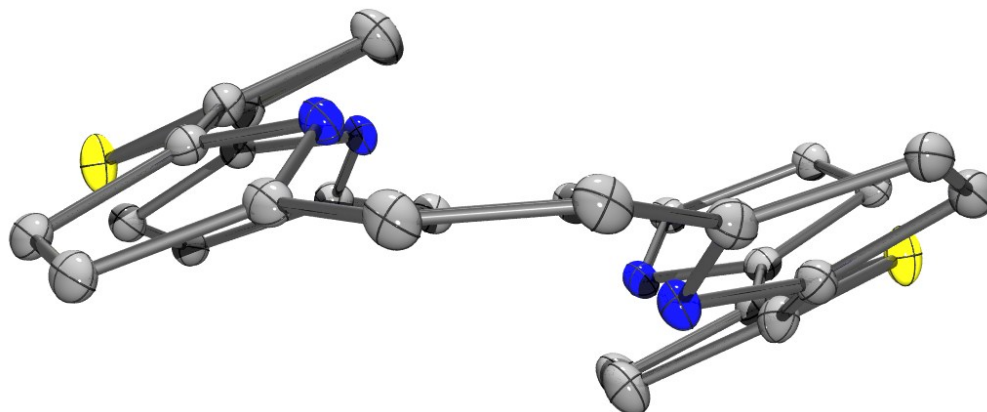

**Figure S20:** ORTEP-POVRAY diagram of  $8.H_2^{2+}$  (side view). All hydrogens, TFA and ethyl groups are excluded for clarity and thermal ellipsoids are scaled upto 50% probability level. Color code: grey = Carbon, blue = Nitrogen and yellow = Sulphur.

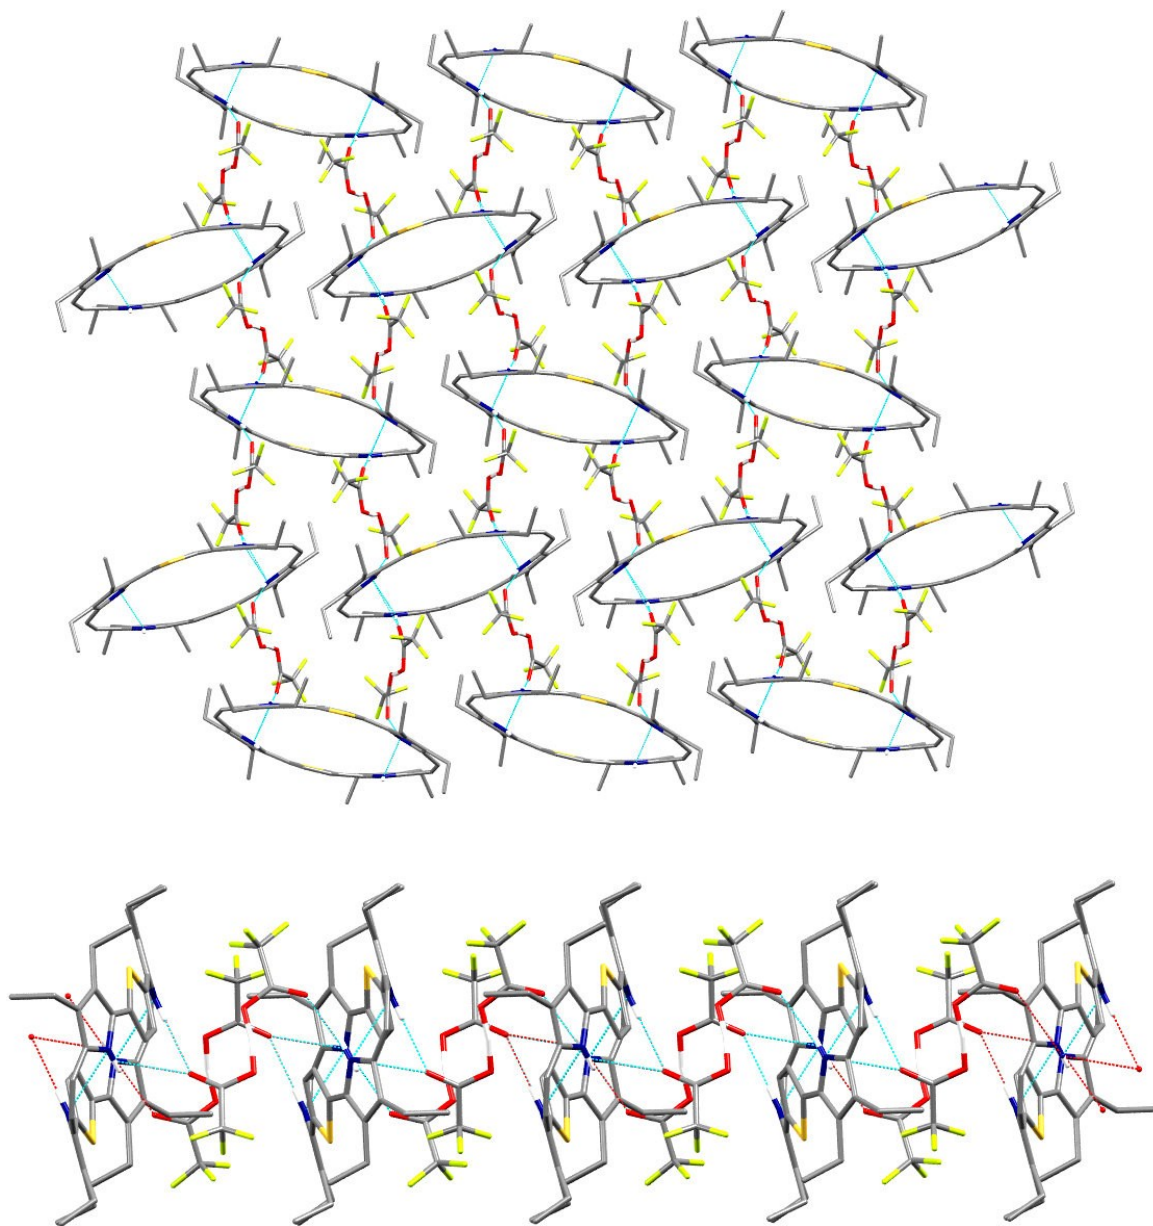

**Figure S21:** Packing diagrams of  $8.H_2^{2+}$  showing anion bridging viewed along the crystallographic axis *a* (top) and *b* (bottom).

## 7. Absorption and emission studies:

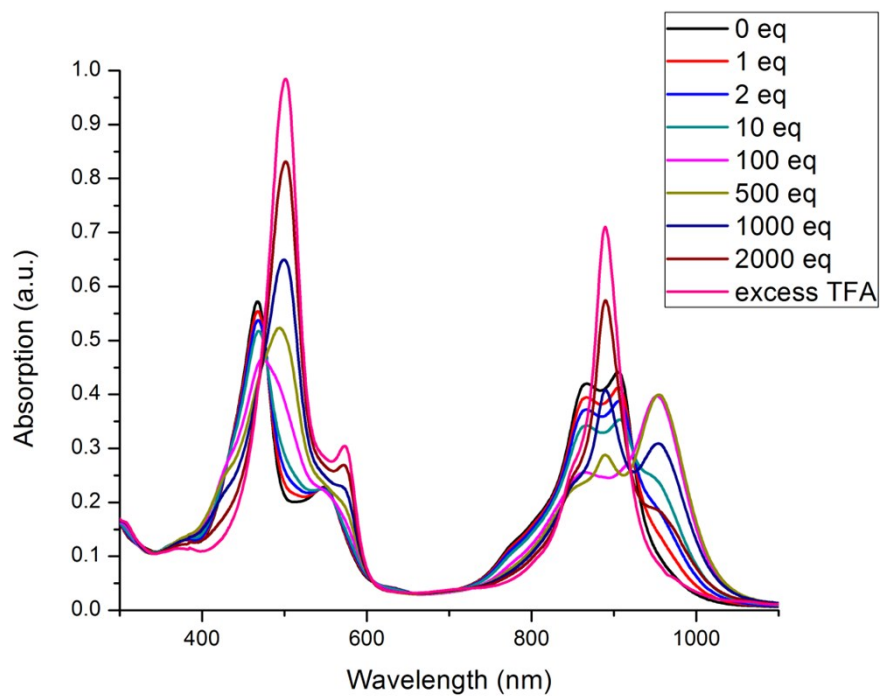

**Figure S22:** Acidometric titration spectra of **8** in chloroform with TFA.

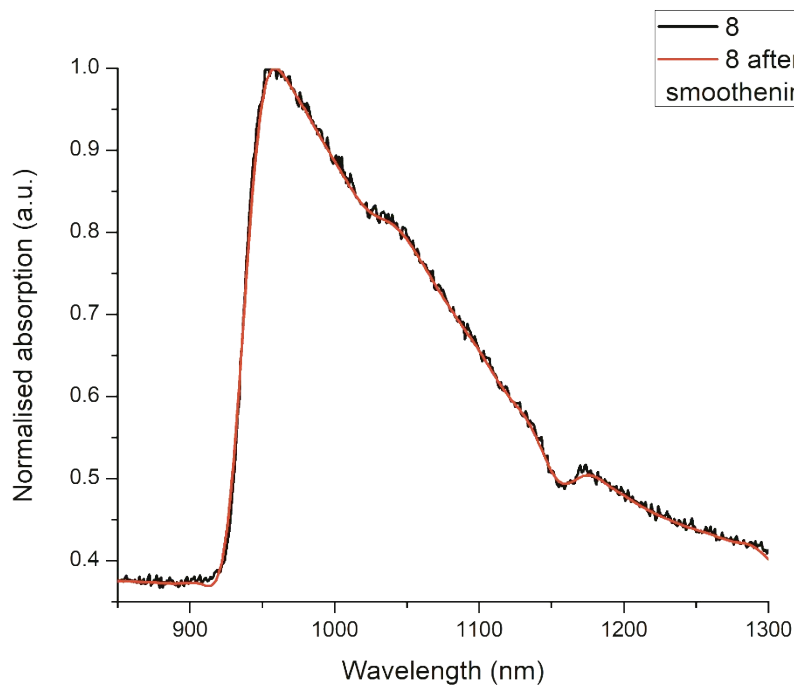

**Figure S23:** Emission spectrum of bronzaphyrin **8** with peak maxima at 959nm ( $\lambda_{\text{ex}} = 450\text{nm}$  with slit widths of 14nm).

## 8. Electrochemical studies:

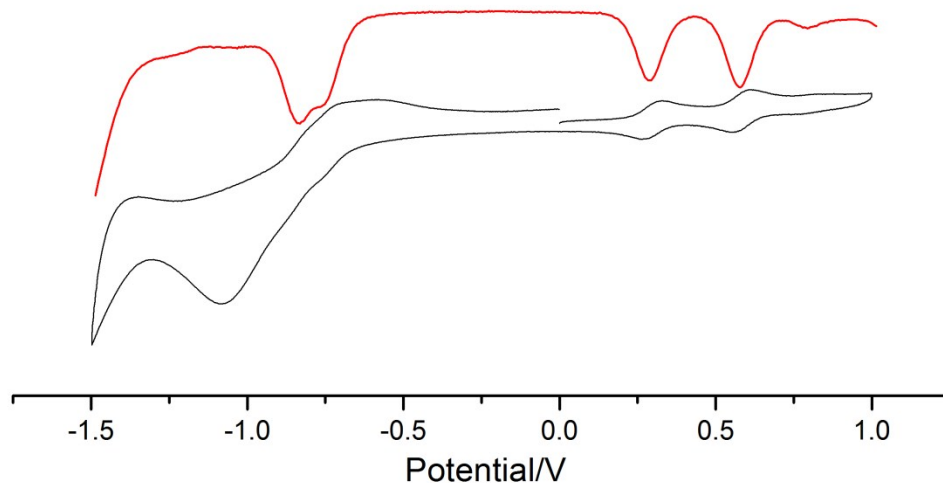

**Figure S24:** CV (below) and DPV (above) of bronzaphyrin **8** in dichloromethane measured at 298K.

## 9. References

S1 Oxford Diffraction (2008). CrysAlis CCD and CrysAlis RED. Versions 1.171.33.55. Oxford Diffraction Ltd, Yarnton, Oxfordshire, England.

S2 SHELXL -Version 2014/7; Program for the Solution and Refinement of Crystal Structures, University of Göttingen, Germany, 1993-2014; G. M. Sheldrick, *Acta Cryst.* **2008**, *A64*, 112.

S3 SAINT, version 6.45 /8/6/03, Bruker AXS, **2003**.

S4 G. M. Sheldrick, SADABS, Program for Empirical Absorption Correction of Area Detector Data, University of Göttingen, Germany, 1997.

S5 a) A. L. Spek, PLATON, A Multipurpose Crystallographic Tool, Utrecht University, Utrecht, The Netherlands, 2002; b) A. L. Spek, *J. Appl. Cryst.* **2003**, *36*, 7-13.

S6 Gaussian 09, Revision C.01, M. J. Frisch, G. W. Trucks, H. B. Schlegel, G. E. Scuseria, M. A. Robb, J. R. Cheeseman, G. Scalmani, V. Barone, B. Mennucci, G. A. Petersson, H. Nakatsuji, M. Caricato, X. Li, H. P. Hratchian, A. F. Izmaylov, J. Bloino, G. Zheng, J. L. Sonnenberg, M. Hada, M. Ehara, K. Toyota, R. Fukuda, J. Hasegawa, M. Ishida, T. Nakajima, Y. Honda, O. Kitao, H. Nakai, T. Vreven, J. A. Montgomery, Jr., J. E. Peralta, F. Ogliaro, M. Bearpark, J. J. Heyd, E. Brothers, K. N. Kudin, V. N. Staroverov, T. Keith, R. Kobayashi, J. Normand, K. Raghavachari, A. Rendell, J. C. Burant, S. S. Iyengar, J. Tomasi, M. Cossi, N. Rega, J. M. Millam, M. Klene, J.

E. Knox, J. B. Cross, V. Bakken, C. Adamo, J. Jaramillo, R. Gomperts, R. E. Stratmann, O. Yazyev, A. J. Austin, R. Cammi, C. Pomelli, J. W. Ochterski, R. L. Martin, K. Morokuma, V. G. Zakrzewski, G. A. Voth, P. Salvador, J. J. Dannenberg, S. Dapprich, A. D. Daniels, O. Farkas, J. B. Foresman, J. V. Ortiz, J. Cioslowski, and D. J. Fox, Gaussian, Inc., Wallingford CT, 2010.

**Complete details of reference with more than ten coauthors in the Manuscript:**

7b M. Ishida, S.-J. Kim, C. Preihs, K. Ohkubo, J. M. Lim, B. S. Lee, J. S. Park, V. M. Lynch, V. V. Roznyatovskiy, T. Sarma, P. K. Panda, C. -H. Lee, S. Fukuzumi, D. Kim, J. L. Sessler, *Nat. Chem.* **2013**, *5*, 15-20.
